# Supplementary material for: Bioinformatic Analysis of Transcriptomic Data Reveals Novel Key Genes Regulating Osteogenic Differentiation of Human Adipose Stem Cells
Source: Stem Cells Int. 2019 Jul 31;2019:1705629. doi: 10.1155/2019/1705629 (PMC6701308; doi:10.1155/2019/1705629)
Supplement: Supplementary Materials — The significant differentially expressed genes between osteogenic differentiated ASCs and controls. [file 1705629.f1.xlsx]

## Sheet: DEGs
Supplementary data
Gene	ASCcontrol FPKM	ASCosteognic FPKM	log2FC	Pvalue
CDH2	49.463	10.686	-2.201	0
NAALADL1	0.916	0.436	-1.06462	1.27e-07
ABI1	18.02	8.57	-1.07361	2.21e-164
KCNE3	0.09	0.52	2.56943	2.65e-15
ZBTB33	3.286	1.46	-1.17066	2.93e-51
CDH3	0.056	0.353	2.67691	4.7e-13
TANK	11.246	5.726	-1.02743	2.11e-49
ZGLP1	0.376	0.78	1.04239	3.97e-05
C19orf71	2.06	4.36	1.08362	1.19e-08
HSFX2	0	0.103	4.58004	0.000442537
C17orf107	0.463	0.09	-2.40857	4.88e-13
TMEM221	0.033	0.276	2.99508	7.91e-07
LOC100130705	0.1	0.743	2.93653	2.63e-29
C6orf99	9.146	3.39	-1.42499	4.64e-24
DPP9-AS1	0.266	0.09	-1.53284	5.59e-05
NEMP2	1.046	0.433	-1.28322	2.74e-14
ANKRD63	0.576	0.233	-1.3121	5.81e-10
C11orf91	3.533	1.73	-1.02851	9.35e-09
FAM196B	6.506	0.486	-3.73469	0
FOXO6	1.083	2.843	1.39601	1.81e-29
KRTAP4-9	0.893	0	-6.84865	7.82e-15
FAM231B	0.19	0.65	1.76901	6.08e-06
C17orf96	5.5	11.426	1.05626	2.04e-91
HCN4	0.19	0.386	1.03806	3.38e-08
FRAT1	0.623	1.406	1.16908	2.8e-12
TROAP	33.856	5.826	-1.9737	3.96e-233
PIGK	9.9	4.123	-1.26313	5.11e-150
MEF2B	2.386	5.483	1.20353	1.32e-25
NBPF20	0.57	0.273	-1.05251	1.94e-27
DUX4	0.08	0.276	1.74997	0.0010084
GS1-259H13.2	0.426	1.046	1.29625	2.53e-05
C4B_2	0.066	0	-5.43921	1.34e-06
GPR75-ASB3	2.53	0.366	-2.77677	2.52e-48
CDH6	0.416	0.046	-3.07527	1.86e-38
TOM1L1	11.373	5.733	-1.0501	3.76e-64
HMGXB4	8.163	3.42	-1.25338	4.76e-110
IQCJ-SCHIP1	9.23	4.383	-1.0727	2.69e-56
SPATA1	0.14	0.613	2.12894	1.48e-10
ARL17B	23.443	9.323	-1.29346	1.88e-78
LINC01272	0.123	0.546	2.14398	3.95e-09
TMEM35B	15.296	32.126	1.0729	1.04e-73
TPBGL	0.013	0.123	3.3874	2.37e-05
TMEM178B	0.013	0.82	5.70208	8.74e-125
TGFBR3L	5.443	14.106	1.37553	6.37e-66
SMC4	17.34	2.9	-2.57371	0
MSANTD3-TMEFF1	2.606	0.52	-2.32406	1.28e-49
RBM14-RBM4	0.95	3.736	1.68465	2.4e-20
RNF103-CHMP3	0.073	0.443	2.61417	1.23e-14
SAA2-SAA4	0	4.5	8.79164	1.75e-44
RPL36A-HNRNPH2	29.393	13.496	-1.12166	9.08e-210
HSPE1-MOB4	0	0.063	5.02983	3.03e-05
SYNJ2BP-COX16	0	0.463	6.73897	5.7e-14
AP1M2	60.17	7.85	-2.93529	0
COMMD3-BMI1	9.37	3.953	-1.24221	1.24e-101
BIVM-ERCC5	2.44	0.823	-1.56546	4.75e-58
DNM1L	23.896	5.026	-2.24495	0
ABCC9	4.063	1.246	-1.70258	3.84e-173
NR1H3	1.283	6.01	2.31485	8.21e-86
FAM47E-STBD1	0.073	0.216	1.5612	0.000243594
IL18BP	0.62	1.363	1.07483	8.69e-08
MUC12	0.003	0.016	3.16501	0.000144812
PTPRU	1.21	4.4	1.86696	1.84e-143
GPC6	1.463	3.246	1.15342	7.27e-67
PTGES3L-AARSD1	0.453	0.196	-1.27225	0.00034631
ACTR3	88.163	35.863	-1.29639	0
ACTR2	103.54	41.153	-1.32892	0
TSPAN5	15.72	7.03	-1.15893	1.52e-152
C5orf66	0.403	0.076	-2.38467	1.85e-09
ADAM8	0.173	0.393	1.19861	3.22e-05
TSPAN2	0.556	0.076	-2.8395	1.26e-18
CT45A7	3.313	0.356	-3.21884	1.05e-29
KIF20A	19.4	2.183	-3.14775	0
CDH13	15.733	32.916	1.21986	0
RASGRP1	0.28	0.113	-1.39724	8.18e-07
DNAL4	5.48	14.4	1.39557	2.46e-82
LRPPRC	19.273	7.03	-1.45252	0
FRY	0.23	0.083	-1.5333	1.63e-12
CDH15	0.32	0.116	-1.46435	3.57e-05
CDH16	0.02	0.106	2.49758	0.00107047
AKAP9	0.86	0.323	-1.40734	5.95e-43
MBNL2	8.396	3.74	-1.16719	8.14e-114
CEBPZ	15.406	5.3	-1.53735	2.77e-225
PDZK1IP1	0.04	0.483	3.63894	2.11e-06
CDH18	0.203	0.033	-2.57221	1.53e-07
LPAR6	0.12	0.563	2.20052	7.51e-12
CDK2	67.4	25.206	-1.41744	0
RBM7	13.78	4.696	-1.55129	2.17e-229
RBM6	14.693	6.133	-1.1657	6.47e-116
ALYREF	134.29	65.306	-1.038	0
LOC101928093	0	0.233	4.36105	0.00127848
LOC101928841	0.096	0.41	2.05124	6.39e-27
TSHZ1	1.063	2.126	1.00187	1.89e-25
PRMT3	9.556	3.306	-1.5251	6.14e-113
MPHOSPH9	2.943	0.446	-2.72358	2.34e-116
MPHOSPH10	10.856	3.45	-1.65318	1.07e-131
ADAM10	15.163	6.213	-1.2811	2.17e-253
MPHOSPH6	19.916	8.306	-1.2592	1.12e-70
USPL1	3.13	0.963	-1.69106	1.13e-64
CDK6	3.253	1.48	-1.13663	5.12e-106
TOPORS	6.796	2.373	-1.49793	1.13e-116
CDK7	32.84	15.7	-1.08083	3.26e-124
RCAN2	1.066	0.103	-3.40409	3.19e-41
RASGRP2	0.47	2.82	2.58766	4.55e-56
CDK8	10.496	4.926	-1.08681	3.13e-84
RIDA	9.956	4.7	-1.08073	1.9e-26
SRRM1	15.36	7.41	-1.05006	7.89e-148
SPRY1	0.49	3.096	2.64852	3.75e-68
STAM2	4.786	1.643	-1.53765	2.28e-121
CNKSR1	0.126	0.563	2.17342	1.26e-11
DENND4A	1.506	0.426	-1.81349	9.04e-75
RAMP1	1.336	6.546	2.28048	4.2e-45
CT45A9	0.286	0.806	1.43476	3.17e-05
LOC102724219	1.84	0.903	-1.0211	1.67e-11
LOC102724428	2.2	6.686	1.60522	2.92e-149
CBSL	0	0.43	6.93266	1.3e-15
U2AF1L5	1.746	0	-7.66556	1.25e-23
LOC102724843	1.84	0.903	-1.0211	1.67e-11
LOC102724951	1.84	0.903	-1.0211	1.67e-11
STAG1	7.92	2.89	-1.45264	6.87e-166
NET1	24.65	4.806	-2.3466	0
PRSS16	1.096	2.196	1.00655	7.62e-16
CDKN1C	0.876	2.613	1.58521	5.63e-23
CWC27	15.043	4.106	-1.87098	3.46e-182
BCAS2	40.616	12.79	-1.66473	1.63e-256
EIF1B	50.626	107.756	1.09186	2.52e-274
SPEG	10.126	4.1	-1.19562	7.9e-86
MAEA	154.106	51.87	-1.53007	0
ZNF267	3.09	0.996	-1.6282	1.49e-49
CDKN2C	18.986	5.34	-2.03973	1.13e-231
TNIP1	53.18	117.876	1.15249	0
TMEM5	7.616	3.783	-1.00591	4.49e-35
CDKN3	72.806	7.83	-3.20549	0
MRVI1	3.003	1.41	-1.10872	2.36e-49
CCL26	5.42	0.44	-3.62383	1.54e-35
ABCA10	0.223	0.043	-2.32685	2.04e-12
ABCA9	0.196	0.496	1.35249	5.29e-13
ABCA8	0.196	0.906	2.26381	4.36e-41
SEMA3A	0.74	0.026	-4.80654	2.57e-59
TUBB3	109.46	47.96	-1.18469	0
BTN3A3	2.393	4.926	1.07077	8.16e-37
SYCP2	0.586	0.166	-1.81962	6.24e-20
MYL12B	613.193	194.846	-1.65712	0
DLC1	20.496	9.513	-1.09827	0
NDC80	17.083	1.72	-3.30894	0
WFDC2	0.87	6.083	2.80978	1.73e-32
SPON2	5.21	32.083	2.63211	0
SPON1	0.096	1.786	4.25344	6.31e-122
TUBGCP3	4.64	2.366	-1.06202	5.88e-43
RBM14	13.32	5.773	-1.20576	9.37e-219
CDX1	0.02	0.21	3.45451	1.3e-05
TIMM17A	79.433	22.45	-1.82102	0
N4BP2L2	9.623	4.566	-1.14798	6.01e-84
VAV3	0.363	0.11	-1.50449	2.61e-07
GPNMB	13.106	51.713	1.98123	0
TACC3	39.986	13.206	-1.59648	0
SLC30A9	17.496	3.4	-2.361	0
COG5	7.193	3.306	-1.12001	7.67e-96
FST	7.58	2.49	-1.6192	4.08e-68
SLC25A17	17.64	7.106	-1.31459	9.23e-140
SLC9A6	3.24	1.31	-1.29964	3.04e-52
CAP2	17.403	4.306	-2.01215	0
CRTAP	28.24	68.68	1.28421	0
SYNCRIP	100.1	33.316	-1.3815	0
VAT1	236.673	495.146	1.06687	0
ENOX2	2.073	0.963	-1.10036	5.5e-24
CEBPA	3.2	6.426	1.00945	8.5e-40
CEBPB	24.563	74.853	1.60918	0
FBLN5	31.086	104.213	1.74721	0
CEBPD	11.406	76.45	2.7466	0
IPO7	35.63	14.206	-1.32435	0
NEBL	0.04	0.396	3.23455	4.34e-32
IFI44	18.74	8.683	-1.10787	1.76e-86
ARFGEF1	4.196	1.76	-1.25068	6.64e-99
CCT2	201.77	51.72	-1.96188	0
CENPA	21.1	4.63	-2.18506	1.25e-209
SMC2	5.03	1.043	-2.25984	6.5e-223
CENPC	1.826	0.636	-1.52062	5.64e-28
USP16	18.383	2.4	-2.93489	0
SH2B2	0.513	1.336	1.38335	1.15e-12
PDLIM5	31.343	12.333	-1.37676	0
SPAG5	13.966	2.19	-2.67256	0
RBCK1	32.27	55.923	1.06191	0
CENPE	2.456	0.19	-3.6797	1.15e-244
IVNS1ABP	12.273	2.873	-2.09495	0
TRIM16	4.856	10.246	1.07951	5.83e-77
TXNIP	28.68	247.533	3.1371	0
CENPF	2.523	0.303	-3.0632	5.92e-268
PDPN	5.17	13.546	1.39219	3.96e-145
POSTN	47.313	2.773	-4.11046	0
RAD51AP1	17.316	5.253	-1.72481	1.26e-198
EXOC5	11.54	3.523	-1.71037	0
DMRT2	0.4	0.166	-1.37838	5.81e-05
CES1	0.066	11.766	7.46676	0
DCTN6	25.416	6.093	-2.0585	8.64e-184
GNA13	9.403	3.54	-1.40658	6e-225
GMEB1	3.6	1.753	-1.0351	3.21e-24
CCT8	151.94	28.263	-2.42339	0
CORIN	0.033	1.37	4.727	4.51e-62
CNPY3-GNMT	0.14	0	-4.31235	0.00161795
CETP	0.01	0.133	3.69552	0.000583182
FAM189B	16.046	34.946	1.11442	5.45e-282
SLC12A7	1.68	3.443	1.04021	2.34e-45
CFL2	94.363	28.456	-1.72193	0
YME1L1	36.9	16.456	-1.16152	0
PLK4	8.066	0.67	-3.59145	0
STAG2	10	2.713	-1.87899	0
RFPL2	0.05	0.206	2.15286	0.000488327
RAI2	0.586	2.976	2.4316	7.62e-56
MAP3K2	3.516	1.346	-1.38406	7.24e-145
NUP50	14.466	7.026	-1.03279	2.1e-177
TOB2	10.033	29.803	1.57268	0
HBS1L	11.333	3.846	-1.66444	0
PLK2	62.306	15.626	-1.99339	0
ZMYND11	12.603	5.61	-1.15258	6.28e-143
SRSF10	16.266	7.14	-1.12536	7.66e-299
ZBTB6	2.566	0.943	-1.44451	9.73e-44
NCKAP1	36.696	16.26	-1.1719	0
IQGAP2	0.163	0.053	-1.67734	1.11e-05
VAMP5	47.1	107.59	1.19359	5.63e-213
ZNF460	0.103	0.313	1.76062	1.6e-07
ZNF268	0.813	0.383	-1.06295	4.34e-13
RPP40	26.883	11.606	-1.19136	1.33e-91
SDCCAG8	20.98	2.913	-2.8468	0
HSPH1	33.23	11.78	-1.49336	0
WASF3	3.98	12.33	1.63314	3.87e-286
CPLX1	2.593	9.343	1.85086	1.93e-117
FRS3	1.39	3.223	1.2118	4.45e-23
FRS2	2.99	0.706	-2.07228	9.95e-135
FAM114A2	4.753	2.083	-1.17288	1.79e-63
CLPX	13.636	6.146	-1.14876	1.27e-183
PGRMC1	74.046	36.026	-1.03576	0
NMU	2.156	1.086	-1.03293	1.56e-05
PPARGC1A	0.026	0.076	1.52969	0.00196991
MALT1	3.753	1.18	-1.66747	1.03e-94
MTMR11	3.176	1.02	-1.61195	6.84e-43
PAPOLA	59.91	15.343	-1.96768	0
TCERG1	9.723	3.806	-1.35257	8.7e-148
SUB1	53.953	22.63	-1.25121	0
DBF4	20.83	3.543	-2.55417	0
SPIN1	20.01	9.083	-1.13732	3.09e-250
POP1	3.85	0.966	-1.99174	1.75e-115
MSL3	13.49	6.826	-1.01077	4.48e-76
CBX1	66.786	33.063	-1.0141	0
PNRC1	13.766	69.75	2.34292	0
TMED2	141.093	61.136	-1.20338	0
ERP29	68.523	147.7	1.09696	0
MLLT11	17.52	6.61	-1.40457	5.38e-146
YWHAQ	285.983	111.483	-1.35695	0
ASCC3	5.793	2.386	-1.34189	1.15e-144
FERMT2	50.596	21.18	-1.25432	0
COPS5	46.616	16.756	-1.47403	4.37e-285
METAP2	42.57	7.75	-2.45645	0
KIF2C	36.013	6.786	-2.39658	0
SPINK5	1.333	0.333	-1.97497	2.71e-31
GLIPR1	31.203	6.486	-2.26377	0
TMSB15A	10.5	3.036	-1.78784	7.91e-38
KDELR3	67.046	26.96	-1.29939	0
RCBTB2	1.803	0.81	-1.24588	2.02e-19
IFT27	10.42	28.996	1.47851	2.38e-130
RBPMS	24.933	68.34	1.49556	0
ADAP1	4.3	21.636	2.34699	0
RIPK3	0.076	0.31	1.99508	3.34e-05
STON1	0.66	1.45	1.15327	1.52e-24
CHD1	3.726	1.32	-1.49615	8.58e-103
DDX52	7.163	2.743	-1.37834	3.74e-173
WWP1	5.556	1.123	-2.30699	1.13e-173
DUS4L	1.75	0.66	-1.42811	2.22e-16
CNTRL	0.69	0.193	-1.73813	5.85e-24
UBE2C	169.833	55.076	-1.6205	0
C10orf10	3.886	160.586	5.37111	0
RAPGEF4	0.046	0.003	-3.46435	0.00198616
TOPBP1	10.093	2.383	-2.07992	0
STMN2	2.646	95.953	5.18248	0
HSF2BP	2.94	1.076	-1.44611	6.07e-24
ESM1	3.3	0.913	-1.85008	3.41e-40
ADAMTS5	0.466	2.126	2.18955	9.04e-148
KRR1	10.993	5.076	-1.11301	3.35e-99
CHEK1	10.2	3.93	-1.46781	5.68e-128
CIT	4.043	0.996	-2.0173	6.52e-225
FGFR1OP	4.86	2.396	-1.02688	1.13e-43
EMILIN1	21.96	48.196	1.13588	0
BTN3A1	1.716	4.01	1.25912	1.29e-46
KIF3A	2.71	0.98	-1.4648	4.11e-71
ZWINT	71.45	17.713	-1.99792	0
PWP1	77.153	31.636	-1.27496	0
TBC1D8	0.39	2.85	2.86955	2.41e-117
GLMN	9.21	2.616	-1.81357	2.79e-104
CORO1A	3.043	0.596	-2.34449	6.7e-44
WDR45	26.276	81.056	1.61883	0
PTP4A3	1.606	3.43	1.09498	4.06e-26
CHI3L1	0.2	1.743	3.13556	1.99e-35
PSIP1	33.76	13.15	-1.35882	0
WDHD1	6.803	2.41	-1.5007	1.64e-174
CHI3L2	0.02	0.83	5.18491	1.01e-18
FAM107A	0.043	8.33	7.64793	0
ADAMTS7	2.156	8.2	1.93036	2.56e-275
ADAMTS6	8.173	0.983	-3.05503	0
BAZ1A	13.143	3.08	-2.0974	0
LZTS1	2.073	0.583	-1.83352	2.67e-65
MAP4K5	11.156	3.273	-1.76134	7.28e-261
PKP3	12.25	5.543	-1.13472	3.91e-97
WBP4	10.85	4.206	-1.36437	3.18e-94
SUPT16H	48.12	19.016	-1.33724	0
ANXA10	0.166	0	-4.81227	0.000124798
CHM	4.88	2.506	-1.18845	2.06e-68
IRAK3	0.74	2.283	1.63564	3.45e-93
AKAP11	2.503	1.15	-1.12021	1.34e-68
AKAP10	4.72	2.206	-1.09449	1.13e-49
DDX20	7.103	3.173	-1.15989	3.01e-72
CHML	5.216	1.373	-1.92304	1.28e-222
MRPL3	128.286	46.746	-1.45433	0
GALNT6	2.366	0.966	-1.29017	1.44e-37
GALNT5	3.163	1.03	-1.61816	7.53e-158
RASSF8	5.996	2.286	-1.45165	2.91e-133
CHN1	10.376	3.433	-1.56608	1.2e-109
RNF24	2.776	7.213	1.37401	7.5e-200
PMF1	45.08	19.84	-1.18532	7.05e-146
ZHX1	8.126	1.906	-2.08215	1.21e-279
NXPH4	4.006	14.28	1.83545	6.68e-146
NXPH2	0.34	0.02	-4.1204	9.52e-13
GTF3C6	63.493	29.06	-1.12544	1.75e-160
GPR45	0.383	0.07	-2.48297	7.55e-07
FILIP1L	8.116	1.423	-2.51498	7.92e-223
RWDD2A	2.45	1.04	-1.23579	3.38e-31
ATXN2L	35.683	96.2	1.42066	0
KLF12	0.97	0.406	-1.2585	4.08e-36
WDR89	4.806	2.003	-1.24435	5.88e-51
PHF21B	1.06	5.376	2.34128	1.14e-146
CHRM2	0.72	0.013	-5.82203	2e-28
CHRM3	0.626	1.3	1.05208	3.37e-10
VPS45	11.87	3.73	-1.62899	2.06e-134
SAAL1	18.213	7.633	-1.25274	2.58e-90
ECD	15.19	5.85	-1.37421	2.1e-128
CHRM4	0.176	0.536	1.60513	5.82e-06
GPN1	27.636	12.12	-1.17474	2.96e-143
MISP3	0.496	1.223	1.29464	6.92e-07
C12orf57	70.496	314.78	2.16771	0
LARP4	8.12	2.743	-1.57228	2.48e-240
STK38	16.106	7.996	-1.00821	9.46e-134
CBX3	97.866	24.826	-1.97301	0
OIP5	10.98	5.183	-1.07873	1.78e-35
EXOSC8	31.576	9.9	-1.67105	3.19e-219
SCRG1	1.553	7.293	2.23427	1.92e-36
AZIN2	0.763	2.143	1.47042	3.54e-17
HELQ	3.1	1.416	-1.29968	4.24e-35
CMTM1	0.553	1.296	1.20259	0.000147577
KLHDC7B	0.116	3.13	4.74487	3.89e-130
CHRNA5	4.37	1.67	-1.38457	5.57e-61
HENMT1	12.02	2.546	-2.21335	6.29e-149
CHRNA7	0.57	1.313	1.22333	2.53e-15
CHRNB2	0	0.066	5.51802	6.36e-07
SLC2A13	0.786	0.32	-1.28193	4.49e-20
PALM2	0.443	0.113	-1.9804	8.28e-28
CGB2	0.37	0.066	-2.60985	0.000665626
NLRP3	1.21	0.363	-1.73801	9.38e-29
CHUK	9.56	4.046	-1.23848	2.15e-110
CYGB	10.84	83.913	2.95404	0
CARD16	1.95	4.4	1.2013	5.31e-11
CSMD2	0.286	0.133	-1.12548	2.68e-12
MBD6	6.94	13.94	1.00775	4.48e-134
TUBGCP5	4.34	1.61	-1.41874	2.32e-67
FMNL2	2.463	1.133	-1.11952	1.35e-38
ESCO1	2.2	1.026	-1.09787	2.16e-27
CCDC85A	7.656	1.563	-2.28785	3.23e-228
TMEM200A	27.613	2.983	-3.20655	0
MYSM1	1.896	0.626	-1.59249	9.9e-70
RNF157	1.296	3.266	1.33084	3.75e-58
OSBPL5	7.476	19.51	1.40296	1.43e-289
OSBPL6	2.05	0.993	-1.04819	4.59e-37
OSBPL8	7.87	3.41	-1.2036	7.23e-173
OSBPL9	21.99	8.633	-1.31935	2.35e-284
OSBPL11	7.96	2.816	-1.49673	7.02e-157
C1QTNF1	2.283	17.926	2.96095	0
C1QTNF5	12.596	28.42	1.17702	6.65e-112
FBXO32	2.1	16.53	2.98196	0
GPRASP2	2.823	0.673	-2.06231	4.9e-72
HAUS1	21.543	8.973	-1.26137	1.38e-79
2019-03-03	2.903	1.183	-1.29267	1.09e-42
ATG4A	6.28	1.673	-1.87011	4.86e-86
DDIT4L	4.303	0.13	-5.01987	3.2e-159
UHRF2	11.613	4.726	-1.29493	1.56e-143
ZNF501	0.403	0.19	-1.15123	3.45e-05
NOSTRIN	0.256	0.073	-1.81227	0.000589622
ALPK2	4.116	1.823	-1.17325	1.12e-88
ARHGAP33	1.43	0.556	-1.36807	1.95e-23
WDFY2	4.366	2.003	-1.12115	2.71e-46
CTHRC1	34.136	77.563	1.19146	1.83e-286
OSR2	2.99	9.156	1.62195	3.29e-81
LYSMD3	5.37	1.676	-1.67669	9.66e-115
BATF2	0.806	4.053	2.30236	5.93e-63
WDR92	5.796	2.346	-1.29537	1.1e-45
NUS1	17.896	8.593	-1.0564	4.22e-211
TM4SF19	0.74	1.856	1.38114	1.13e-08
C8orf34	0.273	0.083	-1.76391	2.36e-05
LYPD1	1.006	0.116	-3.09001	2.38e-39
CKS2	231.676	109.776	-1.07533	0
GRIN3A	0.03	0.003	-3.70536	0.000563765
OLIG1	0.043	0.216	2.31701	3.19e-05
MRGPRF	13.806	6.68	-1.04584	1.78e-77
RPL39L	26.05	53.213	1.03255	9.83e-90
ARAP2	0.853	0.25	-1.74698	8.05e-35
CATSPER1	1.42	0.473	-1.577	1.5e-18
WFIKKN1	0.076	0.683	3.12894	2.39e-15
RAB3IP	1.09	0.413	-1.44285	3.43e-43
SSX2IP	5.383	1.286	-2.05489	8.22e-206
MRGPRX3	2.313	4.81	1.05557	7.25e-21
GALNT15	1.3	19.01	3.92486	0
IP6K3	0.013	0.623	5.69552	2.94e-26
TWIST2	26.243	61.993	1.24326	3.42e-269
PARD3B	0.256	0.69	1.43627	1.22e-23
TRIM6	2.106	0.61	-1.74717	6.32e-37
CLCN3	5.59	2.456	-1.1794	1.04e-102
CFAP70	0.116	0.27	1.20209	0.000213549
CLCN7	11.28	27.56	1.29236	0
CLCNKA	0.113	0.016	-2.8055	0.000483669
ZNF488	0.343	0.15	-1.21437	3.3e-05
PIK3AP1	0.606	0.256	-1.2549	5.01e-11
SFXN2	1.51	0.31	-2.27375	3.38e-30
PDZD8	2.646	1.213	-1.12497	3.8e-48
CLU	11.386	28.316	1.31612	1.79e-281
CLIC2	4.36	1.513	-1.52539	3.59e-52
AGAP11	0.156	0.053	-1.68416	0.000794119
SFR1	5.996	2.633	-1.18736	3.48e-27
CPXM2	1.93	5.55	1.52572	1.66e-91
SERPINA3	0.01	6.41	9.27121	7.93e-114
TPP1	14.743	46.026	1.64423	0
FAT3	0.196	0.066	-1.59098	7.98e-19
PIH1D2	1.033	0.346	-1.57421	2.98e-07
RHEBL1	2.69	5.586	1.05251	3.42e-18
CLTC	46.64	18.703	-1.31636	0
NEDD1	6.6	2.283	-1.52224	2.44e-109
FOXN4	0.04	0.13	1.69552	0.00159977
SLAIN1	1.823	0.586	-1.65622	2.2e-23
PSMB11	0.31	0.02	-4.1342	4.6e-09
LRR1	33.206	10.04	-1.66593	3.02e-232
FRMD6	78.243	27.453	-1.41257	0
JDP2	13.636	65.7	2.27147	0
TC2N	0.733	0.31	-1.23823	3.19e-13
SENP8	1.143	0.51	-1.17484	1.03e-06
TARSL2	2.89	0.903	-1.67592	8.57e-49
TMEM266	0.19	0.43	1.19439	0.00018074
NRN1L	0.196	1.463	2.91565	3.57e-10
CMTM3	27.243	72.16	1.40762	0
CMKLR1	0	0.036	4.45451	0.000827279
IQCK	0.966	3.056	1.6668	1.72e-53
ZG16B	0.04	1.22	4.90197	1.84e-15
ANKS3	4.016	7.88	1.00279	1.27e-43
MSI2	4.526	1.563	-1.46942	1.06e-98
USP43	0.413	0.21	-1.00492	2.4e-05
CCDC43	22.556	8.386	-1.42685	2.62e-188
ANKRD13B	1.793	6.31	1.81738	2.58e-113
ZFP3	0.55	0.23	-1.2663	1.41e-10
SPNS2	0.723	0.316	-1.18595	6.9e-09
MRPL10	33.76	68.206	1.01314	9.83e-271
WDR81	6.69	14.64	1.13534	8.73e-178
TBC1D16	2.936	10.723	1.8871	0
GJD3	1.683	5.026	1.57768	8.04e-94
MIEF2	7.113	3.526	-1.00628	1.21e-41
INO80C	15.146	7.51	-1.00816	1.31e-34
ZNF816	1.026	0.456	-1.15566	4.25e-09
OSCAR	0.956	3.316	1.7989	3.2e-38
ZNF813	0.51	0.153	-1.74271	8.38e-13
ZNF441	0.63	0.213	-1.54628	4.74e-14
MOB3A	10.283	23.356	1.18553	3.94e-230
GIPC3	0.113	0.03	-1.8629	0.000365994
CNN1	23.013	3.306	-2.79881	0
CYP4F22	0	0.113	5.16501	1.16e-05
FBXO27	5.7	16.713	1.55347	2.03e-176
CNN3	176.686	55.583	-1.65683	0
CCSAP	2.22	0.9	-1.30235	1.7e-40
LRRC38	2.92	0.243	-3.57694	1.65e-66
CNR1	0	6.596	12.1192	2.6e-258
WDR63	0.166	0.056	-1.58988	0.00118251
KLHDC9	0.463	1.166	1.34872	5.31e-07
CNTF	0.496	0.16	-1.64235	5.74e-06
CNTN1	0.083	0.01	-3.75981	5.87e-07
TYW3	11.816	4.073	-1.53234	1.09e-177
LRRIQ3	0.17	0.046	-1.78253	0.00165867
ZNF684	1.196	0.353	-1.77431	4.56e-15
PODN	0.073	0.67	3.18773	2.83e-24
LRRC39	0.086	0	-4.21593	0.00243669
GOLT1A	0.82	1.926	1.23212	1.24e-06
UHMK1	11.526	4.583	-1.30962	0
FCRLB	3.396	0.59	-2.51015	1.48e-50
COL3A1	164.34	400.436	1.28682	0
IQGAP3	5.35	0.876	-2.60326	1.64e-282
COL4A2	79.38	179.01	1.17485	0
VSTM2L	2.646	7.95	1.58761	1.81e-74
COL4A3	0.003	0.11	5.74997	2.18e-14
COL4A4	0.043	1.66	5.26117	3.44e-244
COL4A5	0.823	0.116	-2.81675	1.85e-52
COL4A6	0.21	0.02	-3.22731	1.09e-16
DUSP15	0.06	1.093	4.37012	6.07e-20
FAM83C	0	0.08	4.90197	7.01e-05
C22orf39	6.536	14.196	1.09134	1.14e-64
EMID1	0.556	1.27	1.19672	1.51e-09
COL6A3	72.83	195.976	1.42871	0
TMEM150A	7.483	17.906	1.26091	1.74e-90
COL7A1	0.26	2.97	3.51166	0
NUP35	13.613	3.436	-1.98425	1.92e-138
TYW5	1.846	0.853	-1.11327	3.59e-28
COL8A1	16.016	117.176	2.87025	0
COL9A2	1.706	0.743	-1.19756	5.44e-16
RBM45	5.33	1.943	-1.45192	1.91e-40
BBS5	12.453	26.396	1.08517	1.97e-215
COL10A1	0.186	0.05	-2.04445	1.86e-05
COL11A1	2.773	18.6	2.75015	0
REG3G	0	0.383	5.24301	6.44e-06
PLEKHH2	0.213	0.093	-1.21226	6.09e-06
OSR1	4.483	9.763	1.12404	1.61e-51
COL13A1	5.39	0.87	-2.64136	8.33e-144
UBR3	2.846	1.183	-1.26732	6.27e-76
LYPD6	0.696	0.31	-1.1644	9.22e-10
COL15A1	0.38	3.626	3.26446	1.21e-214
TMEM198	0.72	2.05	1.48378	2.62e-21
COL16A1	7.616	41.466	2.44627	0
TMEM178A	0.026	0.18	3.08254	0.000263987
COL17A1	0.333	0.01	-5.24014	3.04e-28
AHSA2	3.503	1.913	-1.06871	1.91e-28
CCDC148	0.396	0.113	-1.58988	1.35e-05
COMP	5.663	23.176	2.0348	0
COPB1	56.24	27.46	-1.02493	0
DCBLD2	19.796	3.796	-2.38061	0
LRRC15	1.03	0.493	-1.0615	1.39e-16
TMEM42	11.303	23.256	1.04267	1.64e-55
SCLT1	9.386	2.653	-1.94402	6.77e-132
C4orf33	3.566	0.616	-2.56202	1.11e-52
PABPC4L	0.68	0.236	-1.50622	7.09e-16
MAP3K8	1.196	2.686	1.1042	2.01e-21
ADM	105.416	248.353	1.23823	0
TRAM1L1	0.81	0.376	-1.09607	1.07e-05
IL31RA	1.446	0.396	-1.8883	2.83e-25
EMB	2.953	0.876	-1.75391	7.47e-69
CAPSL	0.28	0.016	-4.00492	8.64e-05
FAM173B	3.07	1.046	-1.55655	4.92e-38
DNAJC21	5.546	2.083	-1.40836	1.61e-131
TMEM171	1.9	5.976	1.65643	7.91e-38
POC5	4.25	1.373	-1.58718	1.94e-42
STARD4	10.953	2.063	-2.48159	0
UBLCP1	17.016	7.493	-1.18131	4.75e-121
RIPPLY2	0.13	1.316	3.34558	5.65e-11
STXBP5	3.093	1.426	-1.12373	1.44e-79
RAET1E	0.51	1.43	1.47013	1.05e-12
HUS1B	0.2	1.73	3.11056	1.29e-19
TMEM139	12.323	3.6	-1.78387	1.1e-139
KLF14	0.926	0.173	-2.43788	1.73e-12
MTPN	4.136	1.373	-1.58988	1.27e-75
CLDN7	0.183	0.44	1.29994	0.000989492
CPM	1.7	45.033	4.7282	0
LETM2	17.87	7.956	-1.1607	1.25e-135
CRABP1	0	0.283	4.69552	0.000238121
CARNMT1	4.71	1.766	-1.39816	1.82e-76
CRABP2	50.226	24.453	-1.036	3.79e-127
CREB1	3.256	1.72	-1.13053	8.5e-53
ATF2	7.366	2.333	-1.65498	2.57e-150
SLITRK4	0.313	0.13	-1.23624	4.66e-10
HDX	0.56	0.26	-1.08292	1.94e-10
CRIP1	11.68	53.413	2.19491	7.13e-171
TCP10L	0.076	0.44	2.58004	7.08e-12
HAPLN1	19.67	0.31	-5.97489	0
ASB5	0.153	0.006	-4.75981	1.05e-07
ASB8	10.673	5.316	-1.00544	1.84e-64
ZNF358	21.206	70.803	1.74095	0
MYO3B	0.023	0.606	4.85433	7.19e-54
APOBEC3D	0.613	2.256	1.88064	1.54e-34
TCEAL2	7.646	2.963	-1.36523	2.32e-32
NEK7	64.06	5.89	-3.44116	0
ZBTB46	0.54	1.52	1.49836	2.42e-35
WFDC3	0.1	0.513	2.31701	3.19e-05
CTCFL	20.79	8.556	-1.31372	4.79e-248
MROH8	0.166	0.353	1.09105	0.00184726
CRY1	18.92	6.276	-1.59027	2.3e-287
CCM2L	0.226	1.183	2.39143	4.07e-25
RIMS4	1.593	5.303	1.73731	1.57e-145
TMEM37	0.3	0.82	1.44574	6.03e-07
ADAMTS14	0.143	0.053	-1.42026	0.0001605
NRSN1	0.893	6.63	2.89688	4.88e-155
ZSWIM3	0.966	2.013	1.06421	1.1e-15
FAM65C	0.013	2.723	7.48693	3.56e-159
PABPC5	0.24	0.543	1.18773	5.43e-07
SREK1	5.236	2.3	-1.19009	3.92e-107
ADPRH	0.753	2.04	1.37224	7.87e-28
CRYAB	259.246	119.156	-1.08023	0
CRYBA2	2.636	7.863	1.66346	1.03e-30
CRYBA4	0.083	0.376	2.16501	0.00199464
CRYBB2	6.356	2.743	-1.21059	3.87e-16
MIB2	6.17	16.113	1.382	2.52e-195
CRYZ	25.196	4.57	-2.47012	0
MPP7	3.473	0.31	-3.48578	3.21e-206
VTI1A	3.693	1.763	-1.06209	7.45e-42
CSE1L	85.52	11.083	-2.94687	0
CSF1	7.296	165.88	4.54273	0
FAM76B	2.373	1.156	-1.03606	7.62e-24
CSF2	0	0.256	4.58004	0.000442537
ARHGAP42	0.696	0.27	-1.36749	9.5e-14
CWF19L2	5.586	1.4	-1.99443	2.61e-116
KDELC2	12.493	5.386	-1.21164	7.2e-165
LAYN	39.906	13.93	-1.52036	0
CSF3	0.046	4.946	6.86545	1.49e-108
PLEKHA7	2.983	0.746	-2.01214	3.95e-101
SLC2A14	0.01	0.07	2.90197	0.000821709
RFLNA	1.646	11.35	2.7887	9.95e-228
ZNF664	16.043	7.823	-1.03131	4.3e-163
WDR66	9.37	3.766	-1.32717	1.26e-122
BEST3	0.813	0.29	-1.78449	4.06e-12
E2F7	4.88	1.516	-1.68282	3.2e-141
C12orf60	0.363	1.67	2.21747	5.05e-15
HNRNPA1L2	5.453	2.273	-1.2345	9.06e-40
B3GLCT	4.306	1.133	-1.92246	4.29e-110
SERPINA12	0.236	0.02	-3.39724	2.25e-05
MIPOL1	1.226	0.476	-1.36417	6.96e-30
C14orf37	2.036	0.696	-1.48652	7.15e-28
CEP128	2.786	0.613	-2.18653	3.05e-89
CSNK1G3	7.793	2.976	-1.39368	5.4e-126
FAM81A	0.576	0.146	-1.95761	6.72e-14
GCOM1	0.373	0.123	-1.58879	1.1e-10
C15orf65	1.106	3.553	1.68214	5.74e-15
C15orf61	9.143	23.293	1.35138	1.22e-109
CSNK2A2	29.03	66.866	1.20595	0
ADRA1D	1.493	0.07	-4.43423	2.18e-54
BEAN1	0.28	0.57	1.05397	1.71e-05
GSG1L	0.03	0.11	1.86955	0.000142395
ZNF597	0.353	0.15	-1.20286	2.2e-07
BICDL2	0.18	0.03	-2.66788	0.000327005
TMED6	0.913	0.326	-1.47885	7.19e-05
RBFOX3	0.87	2.13	1.29464	3.17e-23
SLC25A10	24.746	5.293	-2.2221	0
KIF18B	7.333	3.25	-1.16299	9.71e-91
EME1	4.09	1.243	-1.71931	2.78e-50
ADRA1B	0.616	4.423	2.84886	1.27e-96
DHRS13	3.016	6.536	1.11662	3.27e-35
CST3	113.986	491.356	2.10944	0
TMC8	0.24	0.023	-3.41996	1.17e-13
ANKRD29	0.08	0.19	1.24301	0.00248429
APCDD1	0.066	39.856	9.25999	0
CSTA	1.033	24.166	4.5509	2.43e-264
CSTF1	17.256	6.78	-1.35024	3.22e-143
HIPK4	0.033	0.14	2.06547	0.00119273
SPC24	14.356	4.866	-1.67216	1.63e-152
SIX5	4.403	9.033	1.03858	2.46e-73
ZNF420	0.696	0.356	-1.04339	1.39e-07
ZNF565	0.873	0.223	-1.93844	3.34e-12
ZNF583	1.38	0.456	-1.59673	6.27e-18
DPY19L3	2.06	0.9	-1.1948	1.01e-38
CDC42EP5	15.016	33.46	1.15786	1.81e-84
ZNF714	5.526	1.42	-1.95545	1.84e-299
ATP8B3	0.273	0.123	-1.18778	1.38e-05
ZNF569	1.203	0.306	-1.97086	6.19e-32
SAMD11	9.38	1.43	-2.71265	2.29e-218
NBPF4	0.323	0.126	-1.34855	0.000276459
ANKRD35	0.286	1.446	2.31701	9.72e-36
B3GALNT2	8.093	2.9	-1.49835	4.37e-160
GLIS1	0.333	1.11	1.73462	7.94e-18
CNIH3	3.293	1.583	-1.02538	3.57e-18
FAM78B	0.023	0.136	2.31701	0.000682936
RNF187	61.716	124.713	1.01672	0
CTNS	5.44	11.863	1.13767	4.65e-146
ADRA2A	0.2	0.096	-1.10008	0.00223206
SIK1	0	0.05	4.79624	0.000133659
CTNND2	0.113	0.226	1.01678	0.000632447
MEI1	1.906	0.796	-1.25601	3.14e-26
CKAP2L	10.703	1.083	-3.30405	0
CBWD2	11.553	4.593	-1.31661	2.12e-76
TEKT4	2.373	7.196	1.55602	3.67e-50
PROM2	0.416	0.153	-1.53248	3.96e-10
CTSD	125.443	541.186	2.11088	0
ADRA2B	0.03	0.13	1.88817	0.000675985
2019-09-10	35.726	12.2	-1.59575	0
ZNF385B	0.156	0.31	1.01893	0.00108931
ERFE	3.213	8.2	1.35377	1.49e-87
KLHL23	1.96	0.11	-4.14157	1.7e-104
SGO2	3.07	0.56	-2.46433	1.27e-113
ALS2CR11	0.353	0.143	-1.38343	0.000117837
SLC23A3	0.046	0.243	2.49758	3.72e-06
CTSK	12.596	39.543	1.6524	0
FAHD2B	8.863	19.103	1.08838	4.13e-69
GDF7	0.033	0.11	1.72443	6.65e-07
CTSV	1.103	0.32	-1.81595	4.08e-29
TTC14	4.916	2.283	-1.10271	5.56e-43
SGO1	7.653	1.48	-2.56623	6.04e-180
CCDC80	153.913	50.743	-1.62967	0
PPP4R2	8.26	3.603	-1.21152	3.42e-121
CTSS	0.256	0.81	1.7143	9.96e-19
ZCWPW2	2.17	0.32	-2.80432	2.56e-58
NEK10	0.41	0.03	-3.54097	7.95e-13
SPICE1	2.096	0.793	-1.37757	4.24e-43
CCDC13	0.053	0.19	1.82516	0.000228539
ZNF827	2.236	0.926	-1.26631	9.22e-59
NIPAL1	0.246	0.076	-1.72916	2.31e-08
PAQR3	6.92	2.86	-1.27243	2.2e-86
THAP6	2.766	1.166	-1.23172	1.79e-32
RASGEF1B	0.14	0.686	2.34086	3.18e-17
SPINK13	3.293	1.216	-1.43022	1.1e-07
CEP120	2.51	1.146	-1.11767	3.8e-33
TMEM167A	25.74	11.586	-1.14929	0
TMEM161B	3.853	1.37	-1.51949	1e-44
CYB561	10.673	21.563	1.01881	9.43e-147
ZMAT2	54.696	25.246	-1.11317	3.27e-236
CCDC112	6.116	2.68	-1.18832	1.31e-46
SH3RF2	0.83	0.196	-2.06381	4.28e-18
CYLD	6.863	1.32	-2.37801	0
SAMD3	1.263	0.146	-3.26962	5.03e-33
SLC2A12	0.403	0.156	-1.36446	7.18e-10
CFAP206	0.183	0.04	-2.26795	0.000234069
AMOT	0.71	0.153	-2.21884	1.15e-35
KCTD7	2.84	1.256	-1.07359	2.22e-33
WBSCR27	1.043	0.483	-1.10801	0.00063483
VPS37D	2.496	5.406	1.11757	1.27e-24
GRK3	1.14	0.473	-1.26865	1.06e-35
SGK223	3.683	1.3	-1.50006	5.23e-75
CDCA2	8.03	0.69	-3.5364	0
ESCO2	3.11	0.57	-2.44098	5.41e-86
FAM84B	5.003	11.163	1.16043	5.04e-176
C8orf37	0.61	0.293	-1.06331	1.5e-06
FAM91A1	12.526	5.08	-1.32181	7.07e-242
C8orf48	2.436	0.73	-1.74188	5.37e-20
CYP4B1	0	0.116	4.80244	0.000128842
RASEF	0.58	0.27	-1.09704	5.72e-10
KIAA2026	1.61	0.73	-1.13599	1.38e-33
PRUNE2	0.21	0.836	2.22195	2.13e-40
MOSPD2	3.613	1.543	-1.2281	3.67e-33
FAM122B	6.453	3.196	-1.02884	4.42e-49
SLC35G1	2.576	0.863	-1.57915	2.28e-42
CYP51A1	16.236	7.776	-1.04909	3.19e-121
DAB1	0.376	0.19	-1.00492	0.00160902
DAB2	39.083	19.23	-1.01915	0
DACH1	0.05	0.166	1.76062	5.67e-06
TMTC3	3.136	1.043	-1.58246	7.57e-105
DENND5B	1.89	0.726	-1.37952	3.09e-68
GPR180	3.006	1.44	-1.05971	1.68e-67
TMEM229B	0.053	0.406	2.9385	5.24e-18
CLEC14A	1.56	0.386	-2.00492	6.6e-25
TMEM30B	0.25	0.116	-1.11789	0.000215979
MDGA2	0.383	0.183	-1.05146	1.4e-06
SAMD15	0.496	0.08	-2.58988	3.33e-10
EML5	0.226	0.056	-1.96098	1.53e-11
DARS	37.62	18.35	-1.03362	2.31e-280
PGBD4	0.493	0.196	-1.33749	1.78e-05
ADAL	2.246	0.593	-2.11349	2.28e-59
BRINP1	0.046	0.276	2.55308	4.98e-09
ZFP1	2.18	0.67	-1.69224	2.13e-38
2019-03-10	0.053	0.623	3.46639	8.39e-25
RHBDL3	0.033	0.156	2.09942	2.79e-06
ZNF519	0.743	0.333	-1.15298	7.44e-16
C18orf54	1.513	0.456	-1.76321	4.98e-44
ZNF610	0.09	0.283	1.70557	0.000192156
ZNF296	1.026	2.35	1.19613	8.18e-14
ZNF846	0.253	0.643	1.35354	2.06e-06
ZNF791	2.813	1.136	-1.30459	1.73e-25
ZNF433	1.236	0.59	-1.07425	8.49e-09
ZNF567	1.233	0.596	-1.04309	6.37e-10
ZNF781	1.22	0.306	-1.98614	1.46e-25
LGI4	0.016	0.116	2.80244	0.000108952
ZNF100	1.03	0.406	-1.32627	8.59e-18
DENND2C	0.45	0.186	-1.21052	3.09e-07
DCN	12.25	487.02	5.30536	0
DENND1B	0.91	0.636	-1.23327	2.07e-18
ACE	0.186	0.716	1.97965	6.46e-21
IFNLR1	0.403	0.963	1.25947	1.23e-15
CITED4	9.366	19.906	1.08888	2.64e-67
SASS6	2.333	0.5	-2.22561	1.42e-69
CNST	9.603	2.88	-1.73772	2.11e-261
FAM43B	0.013	0.453	5.16501	1.8e-18
APCDD1L	9.123	1.913	-2.25342	2.02e-230
DAW1	4.903	11.533	1.2355	1.34e-71
DDIT3	30.45	66.9	1.11459	6.34e-163
AEBP1	9.59	4.13	-1.21349	3.41e-121
CCDC138	4.383	0.913	-2.31996	5.08e-81
FAM171B	2.206	0.413	-2.41893	4.61e-64
DDX1	117.193	19.476	-2.58674	0
DDX3X	52.123	15.41	-1.75591	0
DDX6	14.403	7.113	-1.01575	3.65e-205
DMXL1	0.85	0.406	-1.0692	2.15e-26
XIRP1	0.106	0.01	-3.66788	4.25e-09
RNF168	3.88	1.763	-1.13455	1.05e-58
DHX9	47.22	18.093	-1.38186	0
DDX10	18.733	6.016	-1.63648	1.54e-294
SPATA5	1.603	0.66	-1.2768	4.77e-45
DHX15	50.13	22.966	-1.12423	0
MMAA	0.876	0.376	-1.21812	1.13e-17
TIGD2	4.193	1.156	-1.85568	1.8e-51
MIER3	2.8	1.17	-1.25247	1.65e-48
CFD	8.453	17.55	1.05579	1.25e-48
PRSS35	0.483	0.16	-1.62941	2.17e-07
PKD1L1	0.01	0.036	2.06547	0.00119273
ZNF467	0.52	1.16	1.10756	1.49e-08
OLFML2A	0.28	2.973	3.42237	1.15e-209
ZNF169	0.106	0.326	1.58004	4.57e-05
ZCCHC12	0.116	0.013	-2.87499	0.000808802
PWWP2B	3.833	15.176	1.99386	3.32e-248
DHX36	10.696	3.81	-1.48724	2.44e-162
PSORS1C1	0.473	2.666	2.50097	3.02e-21
ZNF431	2.946	1.13	-1.38354	1.74e-44
DLG1	9.7	3.066	-1.65849	1.66e-237
DLX3	0.316	0.09	-1.81227	5.47e-06
DMBT1	0	0.033	4.58004	0.000442537
ACAN	0.963	0.013	-6.0021	2.38e-122
DNA2	3.493	0.606	-2.52848	5.85e-127
DNASE1L3	0.383	0.113	-1.78253	0.00165867
AGL	2.193	0.756	-1.53874	1.73e-72
DYNC1I2	35.166	10.616	-1.72767	0
TRDMT1	0.473	0.13	-1.84109	2.27e-37
DOCK2	1.33	0.086	-3.93861	2.19e-103
DPEP1	0.06	1.31	4.44354	9.13e-31
DPT	0.356	61.55	7.42926	0
DRD5	0.223	0.836	1.90197	2.16e-13
JAG1	0.513	3.84	2.90145	8.82e-225
DRP2	0.183	0.046	-2.04239	5.26e-10
DSCAM	0.063	0.016	-1.898	0.000633506
RCAN1	69.326	22.183	-1.65362	0
TSC22D3	30.086	314.16	3.40258	0
DSP	26.753	10.896	-1.27036	0
SLC26A2	2.67	0.826	-1.68969	4.8e-110
DTNA	0.933	0.486	-1.02519	6.67e-10
HBEGF	9.543	2.176	-2.12967	2.02e-155
DTX1	0.13	0.366	1.54105	7.94e-07
ECM2	0.333	3.243	3.28333	1.96e-116
DUSP5	22.08	51.38	1.22073	0
DYRK1A	4.816	2.2	-1.1228	3.28e-69
E2F2	1.463	2.996	1.03473	1.59e-38
GPR183	0.103	0.01	-3.46435	0.00198616
ECE1	22.946	49.213	1.10111	0
ECM1	67.563	24.286	-1.47479	0
ECT2	18.57	2.57	-2.79388	0
S1PR1	14.943	6.256	-1.24115	5.78e-143
LPAR1	10.726	26.976	1.33084	5.68e-301
EDNRB	1.03	13.8	3.93515	0
PHC1	5.803	12.453	1.10335	2.46e-171
PHC2	39.45	136.283	1.78803	0
AGO3	1.82	0.863	-1.07531	2.22e-18
EFNA1	1.213	3.89	1.68183	4.44e-32
EFNA2	0.416	0.876	1.07452	3.79e-06
EFNA3	2.43	6.286	1.37446	1.18e-42
EGF	0.226	0.056	-2.0005	1.84e-09
MEGF6	3.296	1.016	-1.69319	3.65e-125
MEGF8	1.613	6.563	2.02119	0
EGR1	37.86	9.456	-1.99964	0
EGR2	1.023	3.88	1.9202	6.57e-67
EGR3	0.87	0.243	-1.84042	3.65e-21
MPZL3	0.483	0.176	-1.45714	2.94e-09
DNAH10	0.063	0.023	-1.35542	0.000173799
EIF1AX	49.953	19.543	-1.35175	0
METTL7B	4.21	1.906	-1.14015	3.62e-19
PLBD2	12.406	38.12	1.62173	0
EIF2S1	59	22.873	-1.36479	0
ARID2	1.32	0.56	-1.24165	3.05e-37
VSTM4	2.31	1.123	-1.15328	3.66e-39
PAOX	1.186	0.576	-1.02764	1.82e-06
UBR1	3.29	1.266	-1.37368	4.16e-96
ZNF48	4.583	10.626	1.23592	1.04e-101
EIF4E	9.896	2.753	-1.84621	0
EIF4EBP1	204.763	639.283	1.64444	0
EIF4G2	301.03	118.066	-1.34747	0
EIF5	53.783	15.75	-1.76985	0
ELANE	0.016	0.283	4.08254	4.84e-05
ELAVL2	2.573	0.85	-1.59987	1.54e-46
ZNF627	2.926	1.353	-1.10711	1.11e-23
GGN	0.396	0.11	-1.86999	2.16e-06
ZNF626	1.566	5.413	1.28586	2.9e-23
ADM5	0.486	2.133	2.13581	2.2e-32
ALG14	16.403	7.416	-1.14242	1.92e-48
A2M	1.346	5.476	2.02436	1.59e-165
ABCA2	2.613	5.396	1.04803	3.85e-108
CRTC2	13.73	28.9	1.07553	6.96e-196
CFAP221	0.026	0.21	3.16501	7.71e-08
ELN	12.383	3.496	-1.81882	2.26e-256
C3orf67	1.086	0.283	-1.94498	2.15e-18
KCTD6	6.38	3.15	-1.02199	1.26e-24
ARL13B	7.053	3.136	-1.15351	3.4e-76
ZNF385C	0.033	0.306	3.26082	3.1e-10
LYRM9	0.973	2.113	1.11571	7.36e-10
LRRC45	3.686	1.633	-1.17245	1.08e-30
UNC13D	4.306	1.44	-1.57851	8.74e-88
SPNS3	0.05	0.19	2.06547	0.00119273
HACD2	22.513	10.093	-1.14447	1.7e-263
STT3B	42.86	14.226	-1.58902	0
EMX1	0.023	0.136	2.58004	0.000608125
C4orf46	8.703	3.513	-1.30743	6.39e-107
TMEM154	1.73	0.856	-1.01358	2.48e-14
EMX2	4.213	2.09	-1.00492	5.4e-29
AIM1	0.3	1.21	2.00181	1.23e-59
TAPT1	2.25	1.073	-1.06652	2.08e-27
RANBP3L	0.033	0.116	1.77689	0.00170264
ENPEP	0.383	0.183	-1.06905	2.97e-06
LGI3	0	0.083	4.99508	3.83e-05
TMEM268	3.33	8.54	1.35748	3.17e-138
C9orf72	2.066	0.63	-1.71473	1.19e-34
EPAS1	17.536	63.783	1.86444	0
ZCCHC5	0.053	0.193	1.94928	0.000149812
NRK	1.073	0.306	-1.78888	9.05e-49
INTS6L	0.806	0.28	-1.52171	5.25e-15
ANO5	0.27	0.076	-1.80561	1.68e-11
EPHA1	0.136	0.013	-3.22731	1.68e-06
EPHA5	0.163	0.04	-2.27171	4.21e-11
EPHB1	4.616	1.77	-1.38232	1.93e-82
NLRP11	0.616	0.296	-1.05551	2.7e-06
EPHB6	0.426	5.09	3.58526	2.09e-216
C2orf69	7.506	3.626	-1.04893	3e-69
SENP5	4.69	2.2	-1.08648	4.23e-77
USF3	0.566	0.19	-1.57318	5.78e-37
ERCC4	1.696	0.736	-1.20438	2.25e-36
ERG	0.56	0.19	-1.75215	4.94e-14
ERN1	0.426	1.083	1.35056	2.78e-17
MECOM	0.733	0.153	-2.11595	4e-26
EXT1	84.203	37.893	-1.14997	0
EXTL1	0.493	0.163	-1.61433	6.55e-11
EXTL2	7.18	2.71	-1.40107	2.4e-88
ALCAM	56.683	19.79	-1.5166	0
EZH2	25.143	8.143	-1.62229	0
F2R	11.703	5.496	-1.08692	9.61e-116
F2RL2	0.61	0.106	-2.56607	4.11e-19
F3	35.966	8.486	-2.08176	0
FABP5	296.106	112.053	-1.39971	0
FANCA	12.026	4.7	-1.26128	1.04e-161
FANCD2	4.37	0.69	-2.65992	3.63e-202
PTK2B	0.7	6.55	3.23649	1.86e-296
BPTF	3.92	1.603	-1.28808	8.11e-145
FANCB	1.45	0.323	-2.13908	2.12e-31
FAP	19.473	3.913	-2.32158	0
FBLN1	8.5	139.86	4.06631	0
SAMD9L	1.553	0.573	-1.46043	1.16e-42
PLAC9	17.66	60.606	1.77962	1.61e-214
MTIF3	21.81	9.656	-1.17641	1.59e-65
YPEL4	0.04	0.65	4.06117	8.03e-16
ZCCHC24	6.856	14.716	1.10327	1.85e-191
UNC5B	6.726	42.126	2.65239	0
STOX1	0.123	0.043	-2.32685	0.000137098
TYSND1	3.57	7.543	1.08052	5.01e-74
ZNF25	1.576	0.713	-1.16218	1.58e-20
RTKN2	1.24	0.573	-1.31092	4.42e-17
HYLS1	9.286	1.636	-2.52555	7.85e-146
FBLN2	14.623	65.686	2.1721	0
GLYATL2	0.54	0.073	-2.87939	1.28e-08
ABCB7	5.433	2.14	-1.35676	2.52e-50
VWCE	0.103	0.853	3.0355	3.13e-32
CYB561A3	18.136	57.756	1.70453	0
DDIAS	7.23	1.86	-1.95632	2.64e-159
FBN2	7.256	55.59	2.93975	0
SKA1	8.256	2.406	-1.77554	6.76e-130
CCDC89	0.733	0.256	-1.52339	3.45e-09
RNF152	0.89	0.226	-1.98981	1.59e-11
FCER2	0.023	0.216	3.24301	7.93e-05
CBWD5	66.62	14.16	-2.01457	3.73e-306
SLC16A9	0.073	0.25	1.71328	3.07e-06
HNRNPA3	73.9	21.163	-1.77409	0
SKA3	9.756	2.05	-2.24946	2.13e-208
FCGR2A	0.063	0	-4.23297	0.00227064
TBC1D32	0.48	0.213	-1.17171	1.13e-08
PI16	2.84	0.023	-6.89163	5.79e-83
ARMC12	0.063	0.583	3.35263	4.09e-09
C6orf1	35.253	80.233	1.2926	8.39e-286
RBM24	4.783	1.223	-1.96221	2.51e-73
RNF182	1.336	0.66	-1.02645	4.34e-12
FCGRT	7.833	36.016	2.20793	0
FKTN	2.336	0.76	-1.61345	6.26e-83
TWISTNB	13.9	4.573	-1.60241	1.11e-251
SP8	0.123	0.49	2.00307	5.03e-13
SDK1	0.096	0.033	-1.87939	7.94e-07
THSD7A	0.023	0	-5.00492	3.7e-05
PRR15	3.63	11.826	1.68069	1.4e-93
SRRM3	0.606	1.37	1.18166	1.8e-16
KIAA1324L	0.8	0.276	-1.55535	2.08e-25
LRWD1	12.36	6.126	-1.00985	3.9e-65
CDHR3	0.026	0.083	1.62407	0.000738993
SLC35F1	0.123	0.336	1.45649	3.72e-08
UNC5CL	0.023	0.146	2.80244	7.88e-06
KCTD20	30.733	11.27	-1.43775	0
SCUBE3	20.956	1.23	-4.08954	0
NKAPL	0.3	0.08	-1.91181	0.000225893
SEMA3D	15.37	0.69	-4.47184	0
FER	2.15	1.093	-1.43839	1.7e-78
FGB	0.076	0.183	1.25992	0.00211575
FGF1	7.013	0.87	-3.00492	8.03e-261
FGF2	34.096	6.783	-2.3275	0
ABCD2	0.003	0.04	3.58004	0.00109141
FGF5	14.53	1.873	-2.9547	0
FGF7	16.056	2.56	-2.64706	0
FGF9	0.013	0.066	2.16501	0.00199464
GPC5	0.403	0.053	-2.83274	7.67e-13
FHL1	96.42	38.56	-1.29817	0
LAMB4	0.17	0.026	-2.47896	1.57e-05
ITGA11	30.116	60.69	1.01254	0
ATF5	78.043	184.933	1.24396	0
MTF2	7.076	1.65	-2.10363	2.87e-196
HSPA4L	9.396	2.806	-1.74431	2.92e-192
CEP162	0.973	0.17	-2.5154	1e-43
RHOBTB3	24.656	10.58	-1.21888	0
COBLL1	0.646	0.243	-1.44102	4.38e-26
RNF44	5.376	14.96	1.47766	3.97e-257
ZNF507	2.516	1.023	-1.29567	4.32e-67
AAK1	2.116	0.856	-1.30615	2.73e-156
ANKRD26	1.333	0.303	-2.14083	3.31e-64
NTNG1	3.303	0.943	-1.80495	1.4e-118
CHSY1	8.81	4.32	-1.02526	5.72e-95
ICK	2.046	0.916	-1.15406	4.13e-37
INPP5F	3.273	1.116	-1.35915	4.85e-42
TRAPPC8	4.403	1.57	-1.48688	7.15e-117
ABLIM3	12.006	38.526	1.69318	0
DIS3	6.983	2.22	-1.65023	6.69e-257
RUFY3	3.426	1.52	-1.17248	1.25e-37
SBNO2	8.573	17.776	1.06441	1.26e-213
TRAK1	12.73	4.323	-1.57622	8.42e-287
SACM1L	11.06	4.073	-1.43354	1.14e-162
KLRK1	0	0.273	5.69552	1.15e-07
MAPRE1	122.476	54.223	-1.17353	0
ATF6	6.203	2.816	-1.13645	1.32e-130
RAB3GAP1	20.906	10.14	-1.04165	5.49e-246
RAB18	19.893	7.136	-1.4774	0
ELL2	37.87	14.1	-1.42327	0
SNW1	56.783	24.706	-1.19956	0
FOXF1	1.03	2.47	1.26836	2.03e-22
CCT5	142.426	59.88	-1.25016	0
TPX2	73.783	15.62	-2.23812	0
PAXIP1	3.726	1.686	-1.13964	6.75e-40
EFR3B	1.603	0.223	-2.82521	2.37e-115
FOXD4	0.18	0.38	1.08226	0.00186386
ACIN1	59.916	29.343	-1.01892	0
MYH15	0.083	0.02	-2.1342	1.88e-05
PCNX1	3.18	1.453	-1.12556	8.65e-113
CEP152	1.206	0.296	-2.02284	6.24e-45
LIMCH1	4.716	1.286	-1.8629	5.96e-165
RIMS1	0.84	0.086	-2.98843	3.27e-45
DAAM1	1.883	0.843	-1.16079	3.58e-33
STK38L	6.72	1.313	-2.35087	1.24e-265
GOLGA8A	2.956	1.066	-1.46899	3.29e-53
PALLD	22.846	51.006	1.17563	0
UNC13A	0.656	0.19	-1.79771	2.76e-37
MYO16	0.04	0.39	3.33493	1.97e-31
RBM34	31.126	15.283	-1.02386	1e-160
MAST3	1.363	3.543	1.38096	1.13e-79
USP33	12.196	5.81	-1.04996	7.32e-130
DOPEY1	0.573	0.153	-1.9051	9.12e-29
ZNF292	1.42	0.7	-1.0133	1.66e-34
XPO7	16.873	7.773	-1.11665	7.92e-221
FOXE1	0.746	0.016	-5.28104	3.66e-38
MON2	2.203	1.1	-1.00585	2.11e-53
TNIK	0.513	0.133	-1.92996	8.26e-32
PDS5B	2.733	0.77	-1.82049	1.04e-115
SETX	3.196	1.256	-1.34292	1.05e-127
SETD1B	1.836	3.67	1.00065	4.73e-69
HECW1	0.013	0.876	6.16099	5.22e-86
UHRF1BP1L	8.24	2.06	-2.25463	1.95e-272
VWA8	2.113	0.82	-1.3922	1.17e-55
FOXO1	0.376	7.006	4.21648	0
TRIM35	3.486	12.03	1.78979	1.57e-277
PEG10	7.94	2.13	-1.89559	0
TTLL5	6.166	2.266	-1.44083	2.5e-118
KIF1B	6.026	2.403	-1.25477	1.62e-166
CDK19	1.803	0.876	-1.02448	4.17e-27
RAP1GAP2	21.426	8.073	-1.40673	0
FLG	0.673	0.123	-2.46435	6.44e-72
CLASP2	3.853	1.196	-1.68423	9.49e-137
CAMTA2	13.7	29.36	1.09644	0
PLXND1	11.87	25.983	1.132	0
KDM6B	1.236	3.486	1.49732	3.52e-100
EPB41L3	27.22	9.936	-1.44726	0
SMC5	3.69	1.456	-1.33945	4.79e-80
N4BP3	1.21	3.303	1.45059	3.52e-81
DCUN1D4	6.683	3.103	-1.08988	9.8e-76
NACAD	0.45	0.173	-1.37229	1.66e-09
GRAMD4	1.11	2.69	1.27802	7.86e-42
2019-09-06	9.626	4.04	-1.21935	4.53e-111
WDR43	20.52	7.046	-1.53964	0
SNX13	3.726	0.956	-1.95621	4.29e-147
EFR3A	13.3	4.906	-1.40421	1.13e-271
RTF1	14.566	6.003	-1.27728	2.32e-243
FAM175B	9.033	3.36	-1.4253	3.11e-107
METAP1	29.99	10.953	-1.45083	0
UBXN4	25.633	7.196	-1.831	0
PSME4	9.056	2.076	-2.12189	0
ATP11B	3.976	1.803	-1.13914	2.43e-82
ARL6IP1	101.056	33.51	-1.59038	0
MLC1	1.386	0.336	-2.0391	5.89e-34
FLT1	3.996	1.456	-1.46562	2e-70
FBXO28	9.743	4.053	-1.25574	1.11e-171
DTX4	0.56	2.286	2.02419	1.47e-81
SYNE2	2.54	0.896	-1.20565	7.18e-34
PLCL2	2.64	0.983	-1.40555	5.57e-42
FLT3LG	5.193	14.466	1.46988	3e-64
VPS13A	0.9	0.373	-1.24949	4.03e-33
TBC1D12	2.413	0.943	-1.35394	6.46e-52
DNAJC9	51.413	15.353	-1.74126	0
PACS2	5.203	11.766	1.1674	2.85e-216
PDS5A	11.276	5.396	-1.08224	2.18e-201
KIAA1024	0.23	0.08	-1.49968	4.48e-08
ANKRD12	2.606	1.216	-1.09988	7.65e-79
SCFD1	42.763	11.31	-1.8698	0
DDHD2	6.226	2.75	-1.16213	1.07e-80
PPIP5K2	3.176	0.733	-2.12176	1.06e-161
ADGRL2	14.01	2.213	-2.66286	0
FMO2	0.013	0.63	5.64613	3.79e-49
TSPYL4	6.39	2.83	-1.17462	3.33e-78
CAMSAP2	5.213	2.396	-1.11435	1.37e-103
FAM208A	11.716	2.193	-2.39433	0
FMO3	0	1.276	8.20453	4.18e-32
AGTPBP1	2.176	0.47	-2.21744	1.18e-71
EHBP1	6.226	2.23	-1.46987	1.53e-126
WSCD1	0.01	0.193	4.49758	8.02e-17
KIF13B	0.32	0.866	1.45687	1.37e-32
FMOD	0.98	35.29	5.16855	0
NCAPD3	5.323	2.503	-1.0878	7.98e-79
DMXL2	1.353	0.406	-1.74259	7.37e-67
DNAJC13	6.35	1.99	-1.66847	8.26e-238
FMR1	5.67	2.276	-1.31514	1.62e-86
TRIM2	1.456	0.633	-1.45105	1.76e-41
KIAA1033	7.42	3.44	-1.10676	1.86e-115
SASH1	5.933	2.1	-1.49395	9.55e-181
DPY19L1	7.623	3.72	-1.03235	5.8e-89
JADE2	4.246	10.12	1.25985	9.07e-216
SMCHD1	3.436	1.196	-1.52156	2.68e-130
PHF24	0.083	0.436	2.37359	6.44e-22
FN1	1074.52	3298.42	1.59597	0
U2SURP	10.076	2.036	-2.30721	0
VPS8	3.466	1.69	-1.03404	5.32e-43
USP24	3.5	1.403	-1.31706	5.69e-133
ARHGEF12	8.416	3.516	-1.25409	1.02e-264
PUM2	10.63	4.6	-1.19629	5.59e-194
TNS2	5.423	17.66	1.70063	0
UFL1	4.08	1.456	-1.48197	8.29e-73
ICE1	3.04	1.176	-1.36664	2.24e-90
NCSTN	26.833	54.783	1.06664	0
ZDHHC17	3.476	0.643	-2.43064	2.24e-134
NCAPH	16.27	4.22	-1.94368	0
PPWD1	11.69	2.73	-2.11308	1.51e-171
FRAT2	1.75	4.65	1.41157	3.49e-41
EXOSC2	33.166	11.196	-1.56691	8.42e-300
DICER1	2.45	0.956	-1.34748	3.49e-92
KCNH3	0.356	0.11	-1.7361	9.3e-09
FNTB	2.903	1.39	-1.06165	7.8e-22
TDRD7	2.396	1.116	-1.10525	1.64e-24
SLC7A8	0.673	4.71	2.74957	1.57e-140
AP4E1	2.36	1.066	-1.15031	1.23e-46
TARDBP	41.123	17.846	-1.20227	0
SLC35A3	10	4.156	-1.26783	1.21e-190
SLC44A1	3.516	21.456	2.0731	0
SF3B1	40.37	13.263	-1.59365	0
ABCB10	5.353	2.346	-1.18627	2.68e-62
ABCA6	0.016	0.76	5.59797	5.13e-59
CBX6	11.303	29.093	1.3655	0
NPTXR	1.733	3.646	1.07086	7.95e-55
CBX5	5.496	2.166	-1.34079	1.7e-228
PHF3	4.073	1.766	-1.19317	1.18e-96
FOLR1	0.786	1.56	1.10551	1.32e-05
HEY2	0.21	0.436	1.0369	0.000385658
DAAM2	1.486	7.726	2.37668	0
KCTD2	11.6	24.276	1.0674	1.16e-223
SUZ12	10.713	4.35	-1.29648	2.79e-164
SPIDR	8.48	4.16	-1.02351	5e-68
MORC3	4.593	1.726	-1.39568	8.12e-75
SKIV2L2	17.983	4.61	-1.96206	0
R3HDM1	9.42	2.51	-1.90272	3e-246
KAT6B	1.653	0.773	-1.10873	1.08e-35
ZNF281	11.833	5.363	-1.12839	5.82e-157
SLC16A8	0.026	0.2	2.93368	3.41e-05
RASD2	2.623	0.386	-2.75302	7.58e-75
TSPAN12	2.44	0.806	-1.58988	1.96e-30
GTPBP4	74.64	20.016	-1.89651	0
CLDN14	0.59	0.05	-3.18443	1.4e-09
FPR1	0.873	12.823	3.86955	1.02e-208
DDX58	6.11	1.803	-1.7574	3.25e-155
ORC3	17.73	3.926	-2.1799	0
OPN3	1.923	9.13	2.24912	3.92e-176
CORO1C	202.15	63.323	-1.6726	0
DAPK2	0.186	0.58	1.64363	7.8e-09
CD2AP	7.146	2.213	-1.68922	1.56e-195
TMEM2	6.366	1.966	-1.70185	4.54e-209
TMEFF2	0.14	0.396	1.47621	4.61e-06
SGK3	1.87	0.413	-2.13924	2.51e-56
PRKD3	5.853	2.383	-1.29527	1.56e-118
KCNE4	3.636	8.403	1.21071	7.74e-83
SHPK	10.106	3.743	-1.43293	7.09e-154
EID1	104.67	29.88	-1.80652	0
PITPNB	35.226	13.426	-1.39065	0
FLRT3	0.363	0.003	-6.39724	2.26e-21
FLRT2	2.9	1.21	-1.25144	1.02e-76
ARHGAP8	1.093	0.503	-1.14458	2.18e-06
ABCA4	0.043	0.116	1.49758	5.34e-05
KIF4A	10.446	2.55	-2.03002	9.21e-303
CLDN15	1.153	3.67	1.67315	7.95e-40
FRK	0.24	0.076	-1.66203	9.07e-05
LACE1	0.536	0.216	-1.31347	7.45e-11
SPESP1	0.14	0.013	-3.58988	0.00105733
FRZB	0.236	0.493	1.06723	8.37e-05
CENPI	5.826	0.693	-3.08602	2.61e-192
NR5A2	0.266	0.02	-3.70296	3.04e-17
FTL	3607.06	10545.7	1.54977	0
STXBP4	0.806	0.35	-1.20606	2.34e-16
FNDC5	0.16	0.04	-2.22731	8.49e-05
ACKR1	0	3.546	9.73655	1.98e-74
RICTOR	1.32	0.576	-1.19593	2.26e-39
FYN	13.17	27.946	1.11229	2.88e-252
IPMK	1.506	0.603	-1.31902	6.51e-34
GPATCH11	5.536	1.37	-2.01549	3.39e-139
ZNF620	1.48	0.556	-1.45026	4.25e-17
ANKRD18A	0.356	0.14	-1.34147	7.79e-07
IFI6	247.286	79.103	-1.64246	0
MMS22L	2.326	0.586	-1.98558	1.43e-127
EBF3	2.24	0.673	-1.73056	7.24e-53
ZDHHC20	8.19	2.313	-1.8246	1.41e-245
YTHDF3	11.47	5.24	-1.12336	3.92e-158
RALGAPA1	1.736	0.586	-1.56688	5.55e-67
BRWD3	0.43	0.19	-1.18177	6.18e-18
SNX32	0.14	0.45	1.71129	2.39e-05
FBXO33	5.003	2.093	-1.25401	2.54e-84
SLC37A4	10.05	4.06	-1.29986	1.33e-73
LCORL	1.346	0.456	-1.5566	1.43e-33
NAALADL2	0.256	0.1	-1.34596	5.15e-06
CALHM1	0.12	0.03	-2.16713	0.000551024
TMEM86B	0.92	2.11	1.20659	1.16e-12
CBARP	0.8	1.933	1.27866	5.3e-18
GABPA	4.74	1.296	-1.87949	4.93e-133
GABPB1	9.013	2.933	-1.47023	5.97e-94
EPGN	0.953	0.173	-2.47756	6.12e-22
ELMOD2	5.16	2.113	-1.28578	8.79e-78
PCSK9	0.263	0.736	1.47876	6.05e-13
NPNT	0.343	0.783	1.18196	5.23e-12
GABRA5	6.093	3.046	-1.02703	1.4e-42
C19orf38	0.296	1.376	2.20659	4.65e-12
BCL6B	0.08	0.01	-2.58988	0.000579494
PAN3	2.763	1.306	-1.07762	4.74e-41
GABRB3	1.96	0.833	-1.23587	4.35e-37
NATD1	2.233	5.343	1.26068	1.8e-84
CCDC110	0.106	0.023	-2.17484	0.00190231
LMNTD2	0.463	0.176	-1.40347	3.93e-05
GABRE	0.456	0.066	-2.74742	5.76e-15
MFSD8	2.816	1.113	-1.34114	1.95e-47
MAMDC2	0.093	0.37	1.99508	6.23e-10
GABRG3	1.15	0.496	-1.18549	3.34e-08
MAP7D2	0.19	0.026	-2.87939	1.28e-08
FRMD3	1.79	0.613	-1.55918	2.94e-43
GCSAM	0.256	0.073	-1.86999	2.16e-06
UTS2B	0.24	0.096	-1.33356	0.00230498
TAB3	2.686	0.863	-1.63259	6.81e-89
C2orf72	0.336	1.57	2.2104	4.7e-42
FAM133B	12.093	5.106	-1.24232	1.23e-91
KIAA1549L	2.983	0.456	-2.70462	0
RAB3GAP2	4.35	2.06	-1.07666	4.58e-82
RAD54B	3.476	0.83	-1.95843	1.09e-76
TMEM59L	0.83	26.47	4.99723	0
CFAP45	0.57	0.153	-1.87165	1.72e-07
NGEF	0.15	0.04	-1.84142	0.0010284
CIZ1	45.09	97.76	1.11682	0
SLC39A6	17.14	8.466	-1.0127	1.66e-142
SVIP	24.82	13.546	-1.34841	1.45e-116
RHBDD3	8.053	18.346	1.1925	1.19e-98
BACE2	5.24	13.81	1.39995	0
FBXL2	1.483	0.4	-1.91045	4.93e-28
HECTD1	12.476	4.043	-1.62265	0
NBPF14	3.026	0.963	-1.64802	1.43e-149
POU2F3	0.11	0.026	-2.11989	0.00160516
NIPBL	2.263	0.85	-1.44832	3.6e-94
RAB26	0.35	0.716	1.0369	0.000385658
METTL7A	0.47	11.866	4.65594	0
ASF1A	16.63	6.68	-1.31392	2.87e-145
MOB4	14.566	5.513	-1.40211	1.11e-210
PARM1	0.236	1.483	2.6687	1.07e-68
ARMC8	9.11	4.29	-1.05993	7.1e-99
TEX40	17.243	7.9	-1.12389	8.17e-36
WHRN	1.006	2.263	1.09045	7.05e-23
NEPRO	10.583	2.566	-2.03518	0
LETMD1	12.933	28.343	1.07486	6.19e-141
MXRA5	0.483	1.853	1.94862	6.86e-113
POC1A	13.513	6.21	-1.09891	2.72e-77
GALNT1	13.26	5.373	-1.30089	1.67e-174
TRIM58	24.3	9.033	-1.42577	0
INTS7	5.206	2.166	-1.25311	3.64e-77
RNF19A	6.713	2.073	-1.6857	2.32e-147
OLFML2B	1.093	5.12	2.23194	3.77e-142
ANAPC15	53.86	13.856	-1.86434	5.67e-259
TMEM158	3.663	23.666	2.69416	0
AHCTF1	7.523	2.733	-1.45301	2.45e-264
POT1	2.81	1.076	-1.37627	6.32e-44
RTTN	0.973	0.383	-1.32685	1.16e-25
THUMPD3	10.26	3.456	-1.56224	3.28e-180
ALS2CL	1.066	0.49	-1.13147	4.8e-16
NALCN	0.273	0.56	1.05142	4.75e-11
NOL11	49.596	15.61	-1.66588	0
ASPM	3.26	0.236	-3.96244	0
CLIC4	219.903	79.316	-1.46902	0
NIPSNAP3A	23.03	6.006	-1.93612	9.01e-242
NSL1	3.813	2.16	-1.10481	2.72e-57
SAMHD1	10.28	25.86	1.33257	9.68e-291
NECTIN3	7.366	2.36	-1.75277	1.49e-200
ZNF385A	7.43	17.853	1.28074	6.69e-139
PNISR	7.29	2.89	-1.33659	5.75e-124
GAP43	0.406	0.153	-1.39724	0.000488896
ADGRA2	10.81	28.37	1.39358	0
KIAA1429	7.12	3.106	-1.18795	6.84e-136
TMEM87A	18.696	7.986	-1.22312	2.13e-179
TIPARP	20.206	8.196	-1.28929	3.62e-255
SNED1	0.333	4.576	3.77969	0
IBTK	5.986	2.63	-1.18364	4.62e-108
CLIP3	22.266	44.853	1.01218	0
MOXD1	7.646	1.15	-2.73297	6.21e-214
ZZZ3	6.713	2.14	-1.64067	2.48e-200
SPATS2L	22.26	9.58	-1.21385	0
TENM4	0.666	0.323	-1.04384	2.12e-23
UPF2	7.506	2.106	-1.83479	7.4e-222
PCDHGA12	1.523	4.07	1.41737	5.8e-77
OSBPL3	5.093	2.096	-1.26344	8.07e-109
GLCE	3.266	1.32	-1.27282	1.21e-63
SIPA1L1	5.493	2.67	-1.04233	3.8e-104
MAGI3	1.076	0.343	-1.6662	1.06e-36
LTN1	3.073	1.166	-1.39272	7.89e-92
SLITRK5	1.09	0.47	-1.21251	1.97e-16
DNM3	0.156	0.05	-1.51949	0.000291319
SENP6	7.57	3.043	-1.35678	1.06e-186
ANKRD17	7.686	3.733	-1.03969	1.2e-176
RAI14	29.523	11.096	-1.41159	0
HERC4	17.38	4.386	-2.09424	0
CCDC69	4.463	9.993	1.16409	8.61e-99
EPC2	5.91	2.32	-1.34603	1.61e-78
FGFR1OP2	21.33	8.483	-1.17295	3.75e-93
GAPVD1	5.486	2.646	-1.03376	3.8e-91
TTLL3	0.326	0.86	1.39275	1.62e-13
IRF2BP1	10.036	21.36	1.09107	8.82e-143
PHF19	61.343	24.926	-1.05042	3.52e-228
ZNF658	0.48	0.19	-1.31661	2.85e-08
GIMAP2	0.11	1.1	3.30251	1.09e-19
GAS1	2.52	72.74	4.85458	0
AMD1	33.146	9.66	-1.77706	0
GAS6	105.47	339.236	1.6873	0
FBXL5	12.13	4.42	-1.45468	1.37e-173
NKX2-8	0.43	1.58	1.88585	6.3e-19
FBXO10	2.53	5.81	1.20229	7.43e-82
FBXO9	13.55	5.366	-1.33379	2.86e-225
FBXO8	7.516	3.526	-1.08984	7.72e-51
FBXO5	17.146	3.093	-2.44144	1.15e-294
FBXO3	7.396	1.87	-2.08342	2.86e-108
SACS	2.59	0.37	-2.80321	0
ARFGAP3	25.94	10.813	-1.259	4.36e-238
MYCBP	15.36	4.903	-1.64527	2.8e-191
GBGT1	1.063	2.32	1.13782	2.95e-14
GBAS	23.81	6.03	-1.98226	4.59e-296
GBP1	8.156	3.943	-1.04627	3.76e-61
GBP2	0.783	1.89	1.27636	1.36e-27
GBP3	9.41	2.966	-1.64289	3.29e-140
HSPB8	25.653	7.876	-1.70099	8.09e-265
GNL3	66.666	26.613	-1.32383	0
SEZ6L2	6.93	20.11	1.52939	2.34e-299
PLEK2	21.866	7.443	-1.55257	5.08e-151
CNNM1	0.616	1.763	1.50165	6.22e-46
ITGB1BP2	0.363	0.016	-4.64877	3.49e-07
GDF1	0.576	2.116	1.87421	6.11e-33
PCOLCE2	12.65	2.853	-2.14788	2.76e-178
OSTF1	40.39	19.086	-1.07953	1.05e-132
GREM1	580.213	156.826	-1.87782	0
CKAP2	20.273	3.696	-2.43613	0
GDI2	177.666	61.56	-1.52429	0
BEST4	0.313	0.8	1.35354	1.58e-07
HS6ST3	0.026	0.17	2.73259	8.93e-14
GDNF	4.17	1.486	-1.48587	1.05e-65
ATP5L2	0.33	0.8	1.29467	0.00201096
RPS6KC1	4.323	1.016	-2.08292	2.21e-119
AMH	0.71	1.786	1.33516	2.19e-13
GGT5	0.953	194.523	7.67376	0
GIP	0.266	0.023	-3.46435	0.00198616
RANBP6	8.27	1.776	-2.15542	6.24e-223
GIPR	0.28	0.116	-1.28336	0.000239933
CHORDC1	32.83	6.77	-2.27606	0
SEC22A	5.94	2.693	-1.13955	1.08e-57
AP3M1	11.31	3.97	-1.49498	2.23e-248
AKAP8L	18.133	41.406	1.19368	7.21e-273
FETUB	0.133	0.013	-3.58988	0.00105733
DNAJC2	11.71	2.853	-2.03332	1.4e-166
MLH3	1.193	0.513	-1.22139	7.79e-31
NPHP3	1.643	0.656	-1.31844	1.28e-32
DIEXF	4.906	1.82	-1.42712	3.08e-165
NSG1	0.506	0.086	-2.4949	1.14e-11
VPS41	6.11	2.46	-1.30814	5.47e-104
LAMP3	0.583	1.306	1.15852	6.22e-14
TSPAN13	10.056	4.97	-1.01508	3.75e-45
MTBP	2.746	0.573	-2.25999	9.31e-64
FOXP1	3.92	1.1	-1.77532	2.57e-134
KCNMB3	0.473	0.183	-1.56824	2.54e-05
CACYBP	62.676	19.28	-1.69537	0
ARRDC2	4.226	35.756	3.07789	0
ZBTB11	2.803	1.39	-1.00994	2.51e-34
FAM155B	3.033	11.31	1.89936	2.39e-270
BBC3	3.14	9.96	1.75087	2.08e-89
DKK3	104.556	38.323	-1.44253	0
AFF4	6.84	3.08	-1.14946	4.05e-185
HSPB7	129.103	6.71	-4.26488	0
SNX5	28.963	12.056	-1.24759	6.61e-211
CPNE7	11.046	62.713	2.50451	0
FAM184B	0.176	0.053	-1.69515	7.98e-05
INTU	0.65	0.213	-1.60129	1.98e-11
AGO2	11.42	5.386	-1.08139	4.63e-103
IL17B	0.073	0.57	2.99508	1.9e-05
OXGR1	0.366	0.116	-1.64538	9.95e-06
GPR78	0.226	0.08	-1.53072	1.01e-05
C5AR2	0.09	0.9	3.36548	2.07e-15
ARFIP1	11.056	4.346	-1.31926	8.18e-117
KLHL20	4.79	2.38	-1.0078	1.6e-39
PCDH17	0.13	0.023	-2.37415	1.22e-09
LSM1	80.636	39.886	-1.0133	3.3e-209
SRPX2	7.266	21.706	1.58004	2.71e-217
ADAMDEC1	0.006	2.38	8.34823	8.29e-68
ZNF544	12.23	4.89	-1.53186	3.61e-160
RAB30	2.093	0.706	-1.559	1.78e-94
BHLHE22	0.003	1.063	7.76327	2.07e-48
TNRC6A	3.806	1.776	-1.09666	1.01e-83
RPS6KA6	0.466	0.12	-1.91838	1.18e-24
ZNF638	5.656	2.013	-1.488	3.38e-155
GOLIM4	6.076	2.653	-1.19509	5.54e-80
UTP20	4.306	1.576	-1.44462	5.97e-157
RABGEF1	26.75	11.766	-1.13735	4.49e-293
EML4	7.02	2.693	-1.3674	1.11e-142
GNAI3	34.873	14.773	-1.23685	0
GNAO1	2.846	6.676	1.22031	9.26e-123
GNAT2	0.243	0.026	-3.32685	4.12e-05
GNAZ	0.48	1.02	1.09357	5e-10
GNGT2	93.813	30.866	-1.64043	0
GOLGA4	4.143	1.98	-1.06106	3.85e-82
SLCO1B3	1.24	0.04	-4.99833	1.68e-53
GPM6B	0.08	2.493	5.20659	8.22e-166
GPR4	0.5	0.14	-1.81681	5.74e-10
FUOM	47.896	14.286	-1.71771	1.01e-176
ANG	4.426	9.703	1.26017	8.14e-29
MKX	0.796	1.696	1.09517	1.06e-17
CDH20	0.016	0.09	2.3874	0.000396406
KLHL35	7.706	20.406	1.40668	2.01e-152
CCDC88B	0.213	0.553	1.35263	1.94e-11
RCOR2	0.766	1.913	1.31701	6.03e-19
IGSF22	0.003	0.046	3.49063	0.00138671
OLFML1	0.05	0.393	2.89125	1.03e-12
CD163L1	0.43	1.436	1.74412	1.5e-36
ADGRD1	0.423	3.173	2.87928	5.96e-168
DPY19L2	1.15	0.376	-1.61064	1.51e-23
GAS2L3	5.383	0.893	-2.57345	2.22e-262
GXYLT1	2.1	0.94	-1.1494	1.44e-45
SLC46A3	0.65	2.463	1.9071	3.25e-50
GPR137C	0.503	0.046	-3.42813	6.42e-24
ZDHHC22	0.22	1.02	2.22218	9.72e-27
TMED8	2.053	0.923	-1.15221	9.47e-47
C14orf80	15.84	6.983	-1.18359	2.1e-78
FAM98B	10.303	3.72	-1.46701	1.18e-185
ZNF843	0.133	0.623	2.2239	1.4e-10
ANGPT1	2.47	6.43	1.41832	5.15e-100
VMO1	0.35	0.953	1.44574	0.00041753
CDRT4	0.1	0	-4.90119	7.25e-05
MEIOC	3.866	0.99	-1.96044	9.81e-113
PIGW	9.146	3.103	-1.57703	4.06e-111
SLC13A5	0.363	1.02	1.50242	1.24e-15
SIGLEC15	0.376	0.133	-1.50742	0.000898406
HMSD	5.27	2.32	-1.18049	6.17e-11
C19orf54	2.553	6.09	1.25599	1.03e-55
LYPD5	0.113	0.326	1.52233	6.11e-05
NKPD1	0.4	0.116	-1.77277	1.24e-11
MAMSTR	1.493	0.573	-1.31259	2.93e-10
ZNF615	0.446	0.216	-1.04712	1.05e-05
ZNF763	0.3	0.066	-2.09524	1.01e-06
VSTM1	27.4	6.87	-1.91456	2.15e-109
FAM102B	4.35	1.326	-1.7136	1e-120
SYPL2	0.04	0.13	1.68314	0.000913758
RSPO1	0	0.206	6.03948	2.43e-09
ZNF326	3.72	1.576	-1.19684	4.6e-106
CCDC150	0.463	0.06	-2.9769	1.31e-18
GPR27	0.193	0.763	1.99116	2.83e-14
DLL1	0.326	0.79	1.26357	3.65e-10
ERICH2	0.173	1.853	3.22774	1.96e-18
FAM126B	1.283	0.583	-1.14305	1.31e-35
SLC9A9	0.28	0.943	1.75783	6.66e-20
GPER1	2.06	0.6	-1.82935	1.9e-33
RABL3	7.553	1.766	-2.09258	9.27e-197
IGSF10	0.026	0.136	2.18963	4.6e-06
DOK7	0.57	0.15	-1.83089	7.66e-09
FRYL	1.976	0.496	-1.99769	1.34e-147
SH3PXD2B	7.213	14.673	1.03038	1.15e-269
RELL2	4.253	1.94	-1.11414	9.98e-27
SREK1IP1	5.72	2.34	-1.28712	8.68e-133
RGMB	21.003	7.303	-1.52177	0
CEP57L1	3.523	0.616	-2.45646	1.04e-75
DCBLD1	7.23	3.483	-1.04929	2.54e-37
GPR35	0.066	0.46	3.09462	6.58e-12
SCARA5	0	0.35	7.43802	7.79e-21
FBXO43	0.633	0.23	-1.44714	6.56e-10
SCAI	0.68	0.31	-1.12311	3.93e-24
ATP11C	3.65	1.076	-1.76525	1.79e-119
FAM133A	0.43	0.143	-1.62383	2.47e-08
STON1-GTF2A1L	0	0.073	5.0689	2.32e-05
LIN9	4.243	1.38	-1.62474	1.4e-64
TRIM59	11.133	2.98	-1.8994	4.11e-255
KRT6C	0	0.12	5.07915	2.16e-05
MKNK2	19.66	87.913	2.10824	0
GRB7	0.62	2.163	1.80745	4.67e-28
GRB10	5.273	11.213	1.10268	1.04e-141
GRB14	0.62	0.253	-1.29443	1.94e-06
GRIA1	0.203	1.526	2.92617	9.21e-85
GRIA3	1.9	0.526	-1.795	1.88e-39
GRID1	0.026	0.083	1.73301	0.000573821
REM1	0	0.53	6.723	7.65e-14
MRPS28	38.566	17.08	-1.17282	8.7e-79
TMEM176B	0.773	1.636	1.12367	2.69e-07
GRN	134.42	271.583	1.01652	0
GIT1	12.676	43.743	1.78883	0
BZW2	65.626	18.136	-1.85407	0
GRIK2	2.003	0.79	-1.33712	3.22e-35
IFT81	2.506	1.043	-1.33339	1.67e-26
RGCC	0.5	59.99	6.90488	0
DBNL	61.446	27.423	-1.16403	0
KLF15	0.02	2.436	6.9415	7.34e-86
ANPEP	69.956	377.82	2.43498	0
GRIK5	0.163	0.04	-2.1342	1.88e-05
GRIN2A	0.04	0	-6.00492	3.95e-09
ZCCHC4	6.543	2.616	-1.33436	2.37e-64
GRINA	91.426	228.643	1.32773	0
SETD2	3.563	1.35	-1.39704	5.38e-116
NR3C1	10.876	3.033	-1.84977	0
CCDC59	20.43	6.606	-1.62658	9.49e-156
TIMM21	13.5	3.273	-2.04252	7.86e-136
STXBP6	19.156	3.57	-2.43287	0
ORMDL2	32.343	13.41	-1.26808	2.22e-142
PYCARD	8.7	19.43	1.16625	5.87e-43
TBK1	7.543	2.016	-1.90022	1.85e-138
CD274	2.306	0.603	-1.60623	2.63e-29
RACGAP1	38.07	11.876	-1.67107	0
GRM4	0.023	0.186	2.9843	6.61e-15
CXCL1	4.683	836.283	7.48186	0
CXCL2	0.93	16.08	4.11682	5.1e-250
CXCL3	0.91	76.43	6.39474	0
GRPR	0.223	0	-6.17484	4.55e-10
GRSF1	26.343	8.78	-1.5835	0
GTF2A1	5.73	2.046	-1.46832	5.51e-144
GTF2B	22.33	8.526	-1.38635	1.64e-137
GTF2F2	40.22	15.49	-1.37467	8.73e-216
GTF2H1	15.296	7.556	-1.01783	1.69e-117
GTF2H2	10.546	4.863	-1.1139	8.66e-56
TMOD2	1.52	0.393	-1.94025	4.01e-86
GUCY1A2	0.073	0.25	1.72412	1.99e-22
CARD10	11.253	5.13	-1.13249	1.83e-121
CYP2S1	0.28	0.063	-2.14242	1.51e-06
C2orf27A	2.843	7.516	1.40617	3.79e-36
ZDHHC1	3.51	9.55	1.44574	8.29e-78
VPREB3	0.176	7.396	5.3988	2.12e-61
REPIN1	18.163	40.21	1.14825	0
GUCY1B3	0.586	0.283	-1.01797	1.03e-05
GRHL1	0.19	0.076	-1.23938	0.00192208
SENP1	4.01	1.39	-1.52573	3.29e-84
NPC1L1	0.006	0.11	3.85824	2.13e-08
CNOT7	48.32	14.916	-1.66254	0
SNX10	0.813	0.353	-1.17182	3.08e-07
GNL2	32.4	11.833	-1.42663	2.4e-302
TRA2A	37.003	14.2	-1.38051	1.94e-258
GPSM2	5.493	1.303	-1.92377	2.31e-119
FAM216A	30.986	12.15	-1.34838	1.3e-168
HCFC2	2.526	0.816	-1.6217	2.63e-70
ALG6	2.476	0.896	-1.46002	1.97e-35
GPR132	0.136	0.296	1.12179	0.000193529
ANAPC4	7.486	1.53	-2.29137	1.15e-151
GYPC	15.263	216.123	3.82514	0
SERTAD1	43.613	20.68	-1.07452	4.3e-131
TRHDE	3.29	0.63	-2.38317	8.99e-145
SLC25A24	19.523	8.253	-1.23973	6.98e-222
PRICKLE4	1.12	3.063	1.4509	1.24e-21
STRN3	10.79	3.136	-1.79916	1.02e-240
LRP12	8.55	2.216	-1.94352	2.82e-215
SCHIP1	7.073	2.45	-1.50772	3.2e-53
DONSON	12.96	3.893	-1.73304	7.24e-171
PILRA	0.26	2.576	3.38219	2.48e-35
LMCD1	53.066	107.476	1.0111	0
GLTSCR2	96.983	211.966	1.1298	0
GUCY2D	0.013	0.07	2.41012	0.00187545
SH3KBP1	22.1	9.323	-1.12035	5.81e-250
GZMM	0.18	1.346	2.90197	9.82e-14
SLC40A1	0.183	0.693	1.92518	1.06e-15
HIST1H1E	0.376	0	-5.09238	2.03e-05
ANXA1	704.726	142.3	-2.30593	0
ANXA2	3101.51	1410.22	-1.12967	0
HARS	56.55	24.776	-1.19629	0
HAS1	1.056	0.4	-1.39858	4.59e-10
HAS2	36.256	1.256	-4.84894	0
HAS3	3.073	0.713	-1.92754	9.97e-70
HBA1	0.113	0.616	2.45451	0.000229013
HBQ1	6.253	16.056	1.36212	3.72e-38
HCK	0.046	20.1	8.75608	0
ANXA3	41.08	13.713	-1.58081	9.26e-302
HDAC2	23.953	10.02	-1.25522	0
HELLS	6.076	2.113	-1.54711	8.6e-85
CFH	2.22	8.82	2.05699	3.91e-177
KCNIP3	1.706	4.31	1.33966	1.92e-43
DNTTIP2	26.5	7.183	-1.88039	0
NRG1	11.336	2.913	-1.8607	3.25e-189
HIF1A	116.433	47.313	-1.29557	0
HLA-B	240.45	500.886	1.0607	0
HLA-DMA	4.82	18.913	1.97439	8.27e-130
HLA-DPA1	0.41	1.47	1.82207	1.65e-15
ANXA13	0.01	0.146	3.69552	0.000583182
HLA-DRB4	0.186	1.296	2.80354	7.42e-16
HLA-DRB5	0.656	2.006	1.6133	2.16e-12
HLF	0.043	0.006	-2.81227	0.00152062
HLX	3.743	9.83	1.39353	1.16e-86
HMGB1	172.393	45.17	-1.93008	0
HMGB2	120.156	53.18	-1.17407	0
HMGB3	19.77	6.136	-1.68428	0
HMGN1	205.183	72.966	-1.48943	0
HMGN2	350.32	137.79	-1.34405	0
HMMR	7.456	0.826	-3.20273	3.13e-242
FOXA1	0.43	1	1.22456	4.28e-12
HNRNPA1	796.393	258.926	-1.61395	0
HNRNPA2B1	217.243	64.683	-1.74619	0
HNRNPD	129.673	34.326	-1.91657	0
HNRNPH1	125.05	53.82	-1.2106	0
HNRNPH2	3.1	0.663	-2.21632	1.55e-54
HNRNPL	218.433	96.853	-1.17394	0
HOXA2	0.573	0.186	-1.61373	2.95e-06
APBA1	1.103	0.443	-1.32027	4.16e-27
HOXA13	0.04	0.16	1.99508	0.000705673
HOXB9	14.31	65.58	2.19845	0
HOXC11	1.25	3.343	1.42049	8.74e-29
HOXC13	0.066	0.99	3.84308	3.97e-31
HOXD3	0.383	0.88	1.20435	1.27e-07
HOXD9	2.546	5.96	1.22892	1.33e-36
HOXD11	0.593	1.893	1.68021	3.39e-15
APC	1.416	0.49	-1.52241	9.82e-68
SERPINA9	0.713	0.023	-5.25285	1.57e-19
HES1	6.81	15.226	1.16284	1.2e-64
BIRC2	27.673	6.29	-2.08311	0
HSF1	73.316	152.19	1.0555	0
BIRC3	0.366	3.466	3.25161	7.64e-226
DNAJA1	205.276	68.62	-1.57956	0
HSPA1B	101.366	218.14	1.10756	0
HSPA8	881.703	431.933	-1.02746	0
BIRC5	69.546	18.84	-1.88311	0
HSP90AA1	815.196	85.463	-3.25047	0
HSPD1	255.39	80.083	-1.67074	0
APLP1	6.063	2.21	-1.45209	1.57e-62
DNAJC4	11.426	23.846	1.06924	3.3e-79
HSPG2	15.673	60.676	1.95406	0
HTR1B	0.043	0.583	3.7895	3.71e-24
HTR1D	0.196	0.036	-2.44861	5.02e-06
HTR1F	0.47	0.123	-1.98981	1.59e-11
HTR3A	0	0.09	4.58004	0.000442537
TNC	5.25	2.153	-1.28266	4.88e-152
APOB	0	0.033	5.90197	1.25e-08
ICAM1	6.173	59.016	3.25911	0
ICAM2	6.21	15.76	1.3845	4.37e-71
TMEM119	11.186	132.126	3.56411	0
PRSS53	0.65	1.643	1.33847	2.43e-13
RAB43	1.343	6.083	2.12104	4.81e-182
ZNF678	0.523	0.183	-1.51969	4.08e-21
MRPL58	46.72	23.296	-1.00201	5.73e-94
ID1	117.763	24.886	-2.26295	0
SPOPL	3.29	1.563	-1.06997	8.18e-49
CYP27C1	1.46	0.51	-1.50843	8.97e-31
ID2	67.38	11.433	-2.55679	0
C2orf74	9.22	3.7	-1.32231	2.21e-29
CCDC36	0.58	0.153	-1.90796	3.33e-11
KY	0.06	0.013	-2.39724	0.000375026
ID3	228.873	54.276	-2.07419	0
NAT8L	1.203	5.3	2.13995	2.47e-216
ID4	3.11	0.09	-5.11444	1.24e-170
ZNF680	1.326	0.606	-1.15459	1.25e-12
TSPAN33	2.043	4.856	1.25105	3.72e-47
KLHL38	0	0.11	4.58004	0.000442537
ZDHHC21	1.133	0.363	-1.63211	2.44e-51
NANOS1	0.3	0.593	1.0002	7.7e-07
FREM2	0.08	0.026	-1.55469	4.95e-07
GLDN	0.016	0.406	4.56509	2.05e-28
ZNF774	0.483	0.226	-1.08898	0.00128091
FMN1	1.1	0.203	-2.40966	1.91e-111
IDUA	2.103	5.533	1.39801	7.61e-48
ZNF677	0.476	0.983	1.07723	1.1e-10
RFPL4A	2.296	0.693	-1.72686	4.9e-12
CCDC18	1.043	0.18	-2.55512	2.39e-42
SP110	6.963	3.03	-1.19617	9.67e-46
IFIT2	16.37	2.763	-2.56652	0
IFIT1	29.943	1.39	-4.42878	0
KCNT2	0.013	0.243	4.08254	1.03e-19
NBPF7	0.126	0.01	-3.57328	0.00102836
IFIT3	40.423	6.696	-2.59449	0
KIAA1211L	0.013	0.106	3.05397	1.06e-05
NCKAP5	0	0.043	5.24301	6.44e-06
SH3RF3	1.143	8.356	2.87244	0
APOC3	0	0.6	5.16501	1.16e-05
MSANTD1	0.02	0.15	3.08254	0.000263987
MCIDAS	0.833	0.386	-1.1204	3.91e-06
ACTBL2	0.286	0.106	-1.41996	0.000161142
IFNGR1	13.253	28.866	1.12493	1.28e-166
APOD	0.536	490.533	9.8397	0
QRFP	0.166	0.666	1.99508	3.34e-05
MURC	0.396	0.106	-1.85768	1.31e-08
SOWAHD	0.01	0.273	4.69552	2.03e-07
IFRD1	19.66	9.683	-1.01835	3.97e-150
TUBB8	0.52	1.293	1.30258	4.89e-08
LRRTM3	0.046	0.006	-3.09238	0.000252277
SERINC2	49.503	194.91	1.98026	0
AMIGO2	22.45	10.4	-1.10391	1.81e-186
APOE	0.57	4.64	3.07162	8.83e-58
TMEM255B	2.833	7.856	1.47334	1.29e-34
RBPMS2	0.96	2.523	1.39752	7.52e-21
IGF2	0.683	8.736	3.6902	0
IGF2R	3.953	11.053	1.48411	0
SKA2	25.213	7.57	-1.7335	0
IGFBP1	1.11	0.313	-1.81891	1.07e-11
FAM131C	2.44	5.826	1.25812	6.85e-34
IGFBP2	0.066	3.366	5.93172	1.7e-59
IGFBP3	947.183	269.163	-1.81302	0
GEN1	1.623	0.42	-1.94157	2.01e-69
IGFBP5	21.62	0.1	-7.72532	0
WDR86	0	0.433	6.28048	9.89e-11
RTN4RL2	1.07	3.01	1.49577	1.46e-29
JCHAIN	0.663	0.023	-4.78628	3.02e-14
RBPJ	9.11	3.88	-1.23094	6.4e-167
LCE2A	2.56	0.593	-2.10926	2.78e-11
KAAG1	1.23	0.323	-1.93903	1.08e-11
TICAM2	4.846	1.686	-1.51905	4.02e-68
FAS	6.836	2.836	-1.26742	1.31e-89
IL1A	0.216	0.016	-3.66788	4.25e-09
IL1B	3.296	0.123	-4.73036	4.16e-68
IL1R1	5.273	30.17	2.52566	0
IL1RAP	2.443	0.713	-1.68504	1.17e-48
IL7	0.116	1.38	3.72091	4.46e-36
IL7R	10.226	1.7	-2.58581	0
CXCL8	12.716	381.27	4.90806	0
AQP1	0.146	0.036	-2.06381	0.00040012
IL11	3.56	0.513	-2.84343	1.32e-81
IL13RA2	7.893	1.71	-2.20565	9.93e-78
AQP3	1.343	0.5	-1.42638	2.19e-11
ZBTB41	1.113	0.54	-1.04092	2.96e-24
IL15RA	1.206	13.816	3.52773	9.47e-261
IL16	0.066	0.45	3.08112	5.16e-38
INCENP	6.29	2.986	-1.07309	8.88e-67
ING2	4.606	1.943	-1.24456	2.55e-37
INHBA	50.256	2.693	-4.21969	0
INHBC	0.01	0.086	3.08254	0.000263987
INSIG1	15.853	7.576	-1.05983	1.17e-118
IRAK1	65.723	143.396	1.12571	0
ITGA6	15.01	4.19	-1.81412	0
IRAK2	0.516	1.54	1.57753	6.08e-26
IREB2	5.536	2.2	-1.32001	1.87e-123
IRF1	6.543	20.206	1.62828	0
IRF5	1.58	3.35	1.08381	8.47e-26
IRF6	0.24	0.066	-1.86141	2.06e-07
AR	0.806	1.756	1.16645	5.73e-46
ISLR	30.11	84.48	1.51388	0
ITGA1	2.616	6.063	1.21483	9.36e-91
ITGA2	2.56	0.496	-2.3601	7.2e-158
ITGA4	3.34	1.17	-1.52405	1.64e-106
ITGA7	0.39	0.213	-1.00492	4.95e-05
ITGAL	0.036	0.166	2.11354	3.78e-07
ITGB1	366.046	145.5	-1.32777	0
ITGB2	0.593	3.193	2.42804	3.93e-77
ITGB3	2.073	0.793	-1.38485	1.03e-39
ITGB8	0.24	0.12	-1.01558	2.65e-06
ITIH3	0.1	0.263	1.41012	0.000178892
ITIH4	0.02	0.1	2.65805	0.000344038
ITPKB	0.516	1.466	1.51041	2.21e-40
ITPR1	0.286	0.706	1.30368	3.93e-26
ITPR3	5.28	16.113	1.61132	0
JAK2	2.13	0.853	-1.27216	1.33e-35
CD82	4.313	71.633	4.05886	0
AREG	1.386	3.823	1.46571	2.14e-21
FAM111B	7.42	1.213	-2.58115	7.58e-224
KCNC1	0.163	0.443	1.38077	5.84e-12
KCNC3	0.093	0.25	1.41012	0.000178892
ANKRD30B	0.093	0.026	-1.70536	0.0015022
HSD11B1L	2.153	4.84	1.21956	1.46e-28
TMEM205	55.42	117.713	1.1291	1.27e-273
YJEFN3	0.566	1.543	1.49465	3.13e-07
KCND2	0.616	0.01	-6.03467	4.69e-48
ANKRD36	1.05	0.283	-1.89109	2.19e-40
KCNE1	0.08	0.01	-2.91181	0.000837608
LHFPL4	0.686	2.583	1.91957	2.27e-77
C5orf34	1.873	0.846	-1.14344	8.93e-15
KCNG1	5.706	12.03	1.07728	6.25e-69
PTAR1	2.756	0.806	-1.77218	2.35e-150
ERCC6L2	1.016	0.393	-1.37684	2.7e-40
CYSRT1	0.783	1.686	1.10784	3.06e-07
KCNJ8	3.526	1	-1.81513	2.44e-48
KCNJ11	0.66	1.686	1.37134	7.78e-23
KCNJ12	0.703	1.48	1.07542	3.69e-21
KCNJ14	0.933	2.32	1.31155	2.36e-24
KLHL30	0.063	0.253	2.02132	1.78e-07
KCNJ15	0.58	2.013	1.78976	2.11e-32
KCNK2	32.67	8.42	-1.93835	0
KCNN4	3.43	8.253	1.26756	1.41e-61
KCNQ1	0	0.06	4.45451	0.000827279
KCNQ2	0	0.033	4.45451	0.000827279
APITD1	13.21	4.406	-1.58232	6.84e-75
KCNS2	0.056	0.786	3.78358	1.95e-32
ARL4D	20.64	44.856	1.122	9.73e-192
KDR	0.046	0.793	4.16193	5.63e-64
KIF2A	7.986	2.153	-1.88812	1.86e-189
KIF5B	27.1	7.146	-1.92164	0
KIF5C	0.31	0.15	-1.06034	7.6e-07
KIT	0.056	0.006	-3.09238	0.000252277
KLK1	2.24	4.846	1.11538	1.09e-12
KLRC2	0	0.29	5.36873	2.34e-06
KIF11	11.103	1.616	-2.77888	0
KIFC1	48.34	17.443	-1.4686	0
KPNA1	16.97	7.383	-1.19824	0
KPNB1	96.5	35.753	-1.40983	0
KPNA2	294.903	72.623	-2.02015	0
KPNA3	22.16	8.35	-1.40563	0
KPNA4	12.99	5.88	-1.14075	0
KPNA5	1.263	0.566	-1.14419	4.17e-09
IPO5	66.383	27.863	-1.25047	0
KRAS	6.966	3.37	-1.04504	6.23e-98
KRT3	0.24	0.006	-5.02074	3.08e-09
KRT5	0	0.063	4.20141	0.00254275
KRT6A	0.02	3.936	7.58287	5.17e-127
KRT8	1383.1	537.333	-1.3603	0
KRT15	0.833	0.096	-3.06905	2.17e-17
KCTD4	0.116	0.016	-2.91181	0.000837608
KRT16	0.34	0.833	1.27825	3.83e-06
CENPW	50.37	14.056	-1.83194	0
CEP85L	0.526	0.193	-1.43078	2.85e-16
KRT17	0.686	3.28	2.26446	3.24e-39
RASL11A	3.256	20.7	2.74579	1.39e-180
GPR153	1.12	4.72	2.07667	1.73e-129
TMEM189	13.973	37.25	1.41636	0
SLC16A12	0.05	0.14	1.4579	0.000500435
FIBIN	1.136	20.26	4.15913	0
C11orf96	0.826	2.686	1.70557	6.58e-20
REP15	0.423	0.133	-1.64235	0.00134033
C12orf75	171.456	69.903	-1.2924	0
SHISA2	1.88	0.723	-1.38114	7.8e-22
KRT19	58.08	0.246	-7.86182	0
TNFAIP8L3	3.683	10.976	1.5783	2.11e-101
SBK1	0.646	2.383	1.88101	3.76e-71
C16orf87	8.593	3.49	-1.2978	5.57e-42
C16orf86	0.506	1.513	1.59264	2.2e-10
CCDC103	2.373	0.9	-1.3987	2.62e-17
KRT33B	1.4	0.073	-4.23608	6.79e-31
YPEL2	0.833	2.45	1.55785	4.79e-59
KRT34	93.626	39.63	-1.23834	0
ZNF790	0.796	0.366	-1.11966	2.72e-06
ZNF808	0.483	0.18	-1.35767	2.58e-07
ZNF888	0.826	0.4	-1.03908	2.52e-06
TMEM238	0.39	1.37	1.80244	1.34e-06
HES5	0.633	0.256	-1.2977	0.000372689
SMIM1	1.343	0.333	-2.00492	1.11e-05
TRNP1	71.536	180.53	1.33746	0
TRABD2B	0	0.226	7.58004	1.39e-22
FAM69A	6.99	2.83	-1.17676	2.04e-47
HRNR	0.023	0.066	1.39718	0.00108704
KRT81	3.046	0.273	-3.46921	7.87e-68
LRRC75B	1.02	2.613	1.36306	3.23e-13
MFSD2B	0.09	0.22	1.27257	0.00238738
SP5	0.663	1.67	1.32762	5.41e-13
C2orf82	0.27	0.12	-1.13616	0.00190581
C5orf46	1.593	0.3	-2.41091	1.43e-08
KTN1	44.846	11.936	-1.91353	0
FAM180A	3.166	0.27	-3.56057	7.86e-68
NUGGC	0.32	1.12	1.82276	3.77e-26
L1CAM	6.5	27.493	2.08415	0
LAD1	0.1	0.013	-3.09238	0.000252277
MAP3K15	0.763	0.313	-1.26265	4.94e-13
LOC389895	3.06	1.476	-1.05052	1.17e-10
RND3	65.896	12.226	-2.42878	0
OR4N2	0.183	0.016	-3.46435	0.00198616
UBAP1L	0.086	0.58	2.77269	5.94e-09
LAMA2	1.67	15.706	3.2377	0
LAMA3	0.156	0.973	2.35364	8.48e-48
FRRS1	1.143	0.536	-1.09366	1.94e-09
LAMB1	13.39	49.583	1.89028	0
LAMB3	25.653	99.756	1.95935	0
LAMC2	51.273	19.3	-1.39995	0
LBP	0.03	0.143	2.41012	0.00187545
LBR	18.73	4.643	-2.01063	0
LCN1	0.066	0.53	2.99508	1.9e-05
LCN2	0.02	1.273	5.99508	9.49e-17
LCP1	0.833	1.913	1.20001	1.69e-23
ARHGAP5	5.403	1.796	-1.58711	1.69e-239
ARHGAP6	0.063	0.186	1.7029	1.39e-05
LEP	0.07	0.54	3.00333	2.05e-20
LEPR	1.046	2.63	1.26559	2.67e-35
LFNG	3.406	1.346	-1.35525	4.97e-28
LGALS3BP	137.996	300.306	1.12371	0
LGALS8	10.29	3.603	-1.51496	1.53e-275
LIG1	17.153	6.906	-1.30906	1.56e-199
LIG4	1.503	0.373	-2.03333	2.77e-40
ABLIM1	1.443	0.67	-1.08909	1.57e-26
LIMK2	14.246	6.81	-1.07059	7.04e-128
LIMS1	33.273	13.283	-1.29782	0
FADS3	40.036	110.9	1.4718	0
FAM102A	6.94	16.106	1.23277	3.1e-206
HEATR4	0.006	0.08	2.99598	0.000477528
SHC4	0.386	0.12	-1.67477	3.02e-10
CASC10	1.31	4.22	1.68982	8.89e-44
LMAN1	25.86	10.786	-1.25946	0
C11orf87	0.13	0	-6.52848	2.43e-12
COLCA1	0.073	0.193	1.41836	1.2e-05
PATE4	0.5	0.226	-1.14671	0.000413076
LMNB1	36.903	15.753	-1.19583	1.25e-277
C15orf54	0.153	0.026	-2.49035	2.69e-05
FAM174B	0.296	0.886	1.56978	4.22e-12
SH2D5	4.023	1.416	-1.51835	1.78e-66
LMO7	22.416	6.753	-1.71971	0
ANKRD36C	0.673	0.276	-1.27772	1.06e-19
C4orf3	60.536	26.47	-1.19148	0
LNPEP	1.5	0.57	-1.38635	1.88e-26
VWA5A	0.323	0.756	1.69552	1.35e-13
PRRT4	0.06	0.493	3.05397	2.35e-14
SAMD12	0.723	0.33	-1.49188	8.65e-25
CENPP	1.136	0.343	-1.71454	2.01e-21
SNX30	2.693	1.256	-1.09546	6.52e-55
GOLGA7B	0.106	0.523	2.28224	4.51e-27
ARL2	122.773	292.68	1.252	0
LPO	0.116	0.023	-2.39724	0.000375026
IFITM10	1.576	7.296	2.2113	2.68e-195
PLPP6	2.873	1.043	-1.4552	4.5e-36
LRP1	22.866	51.316	1.16786	0
LRP3	14.61	31.156	1.09459	2.44e-299
LRP6	1.286	0.52	-1.30978	1.41e-46
HAPLN4	0.003	0.11	4.51864	1.23e-06
LRP5	7.546	17.53	1.21833	4.04e-279
SPINK6	119.516	23.76	-2.28987	0
LSAMP	0.153	0.036	-2.08377	1.84e-11
FAM45A	16.733	8.35	-1.00317	5.39e-94
LTBP1	0.403	1.863	2.24301	5.21e-73
LTBP3	9.723	21.963	1.17792	1.83e-297
LTBR	49.906	124.4	1.34538	0
LTF	0.006	0.366	5.80244	7.26e-15
LTK	0.036	0.133	1.93368	0.00116069
LYL1	0.586	0.236	-1.31526	5.24e-05
TACSTD2	0.04	0.193	2.25812	0.000249152
TM4SF1	27.97	13.2	-1.08077	5.23e-121
TNFSF12-TNFSF13	0	0.236	5.71973	9.01e-08
NOMO3	0.506	1.02	1.01218	1.13e-11
MAB21L1	3.63	0.923	-1.97128	1.18e-66
MAD2L1	80.77	38.546	-1.06501	1.25e-285
SMAD5	7.373	3.18	-1.20761	2.44e-157
SMAD7	16.133	5.82	-1.45045	3.43e-160
SMAD9	1.46	0.253	-2.53074	2.85e-70
MAN1A1	2.53	6.796	1.42839	5.02e-136
MAN2A1	5.953	2.176	-1.44914	2.05e-171
MAN2B1	11.61	31.756	1.4534	0
MAP1A	9.406	4.1	-1.19664	5.98e-290
MAP2	0.15	1.146	2.93716	1.94e-69
MAP6	1.063	2.326	1.03403	7.79e-18
MAPT	1.29	4.2	1.71299	6.51e-125
C10orf55	0.316	0.08	-1.9816	1.84e-06
MATN2	2.513	0.613	-2.03524	6.89e-69
MATN3	1.116	3.743	1.74592	1.65e-52
MBNL1	22.28	9.743	-1.15514	0
MCM6	24.84	11.616	-1.09418	1.38e-243
MDFI	3.096	6.663	1.13589	1.36e-33
MDK	34.396	82.21	1.30598	1.17e-252
MEF2C	1.376	0.183	-2.89716	7.61e-81
ARVCF	1.026	0.346	-1.57873	1.21e-20
MEIS2	10.35	2.886	-1.81537	1.46e-173
MAP3K4	3.44	1.556	-1.14395	4.35e-54
MEOX1	0.17	0.03	-2.46435	0.000216091
MEOX2	0.26	0.04	-2.62941	6.54e-07
MET	7.223	2.103	-1.72603	2.62e-216
MFAP3	5.75	2.646	-1.09817	1.02e-73
MFAP4	17.473	37.003	1.0841	1.66e-175
MFGE8	126.773	389.253	1.63439	0
MGAT3	0.01	0.053	2.41012	0.00187545
KITLG	10.31	1.77	-2.54003	0
MGP	0.243	18.366	6.17167	0
MID1	0.526	1.063	1.00923	4.4e-17
ATXN3	2.726	1.106	-1.29964	8.21e-66
MKI67	5.8	0.73	-2.96933	0
MKLN1	3.72	1.696	-1.12955	2.69e-115
MLF1	10.116	3.723	-1.43777	2.95e-91
MLH1	21.713	8.286	-1.39674	1.46e-207
MAP3K10	2.956	6.803	1.20492	2.41e-72
ASCL2	0	0.226	5.63894	2.03e-07
AFDN	3.72	1.416	-1.39304	6.02e-109
MLLT6	5.216	10.656	1.03185	1.65e-189
NR3C2	0.96	0.16	-2.61588	1.59e-50
MME	14.853	30.56	1.04755	0
MMP1	497.16	15.603	-4.99605	0
MMP2	199.983	486.896	1.30146	0
MMP3	54.73	6.273	-3.12252	0
MMP7	0	9.103	10.2642	1.12e-98
ASTL	0.053	0.39	2.90197	2.51e-06
MMP10	0.716	0.08	-3.10555	1.14e-14
MMP11	1.106	3.216	1.53832	6.05e-34
MMP12	0.393	0.02	-4.46435	2.06e-11
MMP15	1.09	7.466	2.78153	4.22e-297
MMP16	0.85	0.096	-3.13532	3.54e-58
MMP17	4.236	10.75	1.34544	1.43e-94
MNAT1	43.566	17.206	-1.339	6.62e-213
MPZ	0.38	1.353	1.84853	1.17e-16
MRE11A	5.346	1.143	-2.22237	1.51e-199
KLK14	0	0.366	5.45451	1.12e-06
TMEM41B	7.93	3.603	-1.11764	4.97e-84
IQSEC3	3.513	9.396	1.83191	0
SMCO3	0.04	0.413	3.37359	3.14e-11
PLEKHG7	0.12	0.013	-3.52848	6.67e-06
MZT1	15.9	6.8	-1.22289	6.5e-119
GOLGA6L22	0.103	0.026	-1.98492	0.000950303
GOLGA8B	2.54	0.86	-1.56009	4.33e-50
GPR179	0	0.023	4.58004	0.000442537
PSG8	0.18	0	-5.05716	2.59e-05
ZYG11A	2.716	1.313	-1.02683	2.45e-27
TRIM67	0.006	0.053	3.74997	6.28e-07
ODF3B	0.903	4.57	2.33946	9.92e-35
TMEM150C	0.09	0.746	3.06547	6.03e-16
ANKRD20A2	0.05	0	-4.36388	0.00128666
SPATA31C1	0	0.046	4.40107	0.00106434
ANKRD18B	1.32	0.176	-2.91113	8.28e-50
NRARP	3.583	9.906	1.47004	5.51e-108
CT45A3	0.206	0	-4.60543	0.000396617
[truncated: 2,543 more rows]
